1 **Ensemble Learning: Predicting Human Pathogenicity of Hematophagous**  
2 **Arthropod Vector-Borne Viruses**

3

4 Huakai Hu<sup>1,2,#</sup>, Chaoying Zhao<sup>3,2,#</sup>, Meiling Jin<sup>4</sup>, Jiali Chen<sup>5</sup>, Xiong Liu<sup>2</sup>, Hua Shi<sup>2</sup>, Jinpeng  
5 Guo<sup>2</sup>, Changjun Wang<sup>3,2,\*</sup>, Yong Chen<sup>1,2,\*</sup>

6

7 <sup>1</sup>School of Public Health, China Medical University, Shenyang, Liaoning province, China

8 <sup>2</sup>China Chinese PLA Center for Disease Control and Prevention, Beijing, China

9 <sup>3</sup>School of Public Health, Zhengzhou University, Zhengzhou, Henan Province, China

10 <sup>4</sup>Liaoning Provincial Center for Disease Control and Prevention, Shenyang, Liaoning,  
11 People's Republic of China

12 <sup>5</sup>School of Medicine, NanKai University, Tianjin, People's Republic of China.

13

14 Running title: Pathogenicity of Hematophagous Arthropod Vector-Borne Viruses

15

16 \*These authors contributed equally to this work and are listed as co-first authors

17 Correspondence to Changjun Wang, [science2008@hotmail.com](mailto:science2008@hotmail.com); Yong Chen [chenyonger@12](mailto:chenyonger@126.com)  
18 [6.com](mailto:chenyonger@126.com)

19

20 **Abstract**

21 Hematophagous arthropods serve as crucial vectors for numerous viruses, posing significant  
22 public health risks due to their potential for zoonotic spillover. Despite the advances in  
23 metagenomics expanding our understanding of arbovirus diversity, traditional phylogenetic  
24 approaches often miss the pathogenic potential of viruses not yet identified in humans. Here,  
25 we curated two datasets: one with 294 viruses and 36 epidemiological characteristics  
26 (including virus properties, vector hosts, and non-vector hosts), and another with 71,622 viral  
27 sequences focusing on pathogenic traits. Using these datasets, we developed a regression  
28 model and a prediction model to assess and predict viral pathogenicity. Using these datasets,  
29 we developed a regression model and a prediction model to assess and predict viral

30 pathogenicity. Our regression model ( $R^2 = 90.6\%$ ) reveals a strong correlation between non-  
31 vector host diversity, especially within *Perissodactyla* and *Carnivora* orders, and virus  
32 pathogenicity. The prediction model (F1 score = 96.79%) identifies key pathogenic functions  
33 such as “Viral adhesion” and “Host xenophagy” as enhancers of pathogenic potential, while  
34 the “Viral invasion” function was associated with an inverse effect. Validation against an  
35 external independent dataset confirmed the models’ ability to identify pathogenic viruses and  
36 revealed the potential threat posed by Palma and Zaliv Terpeniya viruses, previously  
37 undetected in humans. These findings highlight the necessity of integrating predictive models  
38 with metagenomic data to provide early warnings of potential zoonotic viruses carried by  
39 hematophagous vectors at the strain level, enhancing public health responses and  
40 preparedness.

41

42

## 43 **Introduction**

44 Hematophagous arthropods, such as mosquitoes and ticks, play a crucial role in ecosystems as  
45 blood consumers and disease vectors (Cuthbert et al., 2023; Touray et al., 2023). They can  
46 harbor various pathogens, including bacteria, fungi, and viruses. Viral infections in these  
47 organisms are classified as Arthropod-Borne Viruses (arboviruses) and insect-specific viruses  
48 (ISVs) (Calisher & Higgs, 2018; Gould et al., 2017; Nouri et al., 2018; Zhao et al., 2022).  
49 Arthropods have the ability to carry and spread various pathogens, which pose a significant  
50 threat to the health of humans and animals. This can lead to outbreaks and an increase in  
51 annual mortality rates (Batson et al., 2021; Chala & Hamde, 2021; Roth et al., 2018). Notable  
52 arboviruses include Zika virus (ZIKAV) (Khongwichit et al., 2023; Weaver et al., 2018),  
53 Japanese encephalitis virus (JEV) (Kampen & Werner, 2014), and the incessant menace of  
54 Dengue virus (DENV) (Fournet et al., 2023). In recent years, propelled by the widespread  
55 adoption of viral metagenomics sequencing technologies, the identification of a wide range of  
56 established and emerging viruses within hematophagous vectors, such as mosquitoes and ticks,  
57 has become feasible (Ni et al., 2023; X. Yang et al., 2023). This technological progress

58 presents an unprecedented opportunity to comprehensively explore the distribution and  
59 transmission patterns of arboviruses and ISVs across a spectrum of hosts, including both  
60 vectors and non-vectors. Such advancements are crucial for supporting early warning systems,  
61 facilitating the anticipation and mitigation of disease spread before its onset (Birnberg et al.,  
62 2020; Brinkmann et al., 2016). Despite these achievements in viral metagenomics, current  
63 bioinformatic methods for virus recognition still face limitations (Fang et al., 2019). Accurate  
64 identification of a significant number of unknown contigs remains challenging. Particularly  
65 when identifying known or novel viruses, the direct isolation and cultivation of these viruses  
66 from vectors proves to be formidable tasks, hindering in-depth exploration of their  
67 pathogenesis and immune response (Lewis et al., 2021).

68 In general, the close phylogenetic relatedness among viruses can provide insights into their  
69 potential for human infectivity, as closely related viruses are generally presumed to share  
70 common phenotypes and host ranges (Geoghegan & Holmes, 2018). However, despite being  
71 a common rule of thumb for virus risk assessment, the extent to which evolutionary proximity  
72 to viruses with known human infectivity accurately predicts zoonotic potential remains  
73 unexamined in the current literature (Behl et al., 2022). A model is specifically designed to  
74 utilize sequence features of closely related viruses (i.e., strains of the same species) to discern  
75 their potential for human infectivity (Zhang et al., 2019). However, this approach may  
76 overlook critical functional information of the viral genome, leading to a model that might not  
77 reliably identify pathogenic features applicable across diverse viruses. Consequently,  
78 pathogenicity predictions derived from such a model could be prone to significant biases  
79 (Mollentze et al., 2021).

80 The transmission of a virus is influenced by various epidemiological characteristics, including  
81 not only the virus itself and its vector host (Zaid et al., 2021; Y.-J. S. Huang et al., 2019a;  
82 Viglietta et al., 2021), but also geographical and climatic conditions, as well as interactions  
83 with non-vector hosts (Ciota & Keyel, 2019; Conway et al., 2014; Forrester et al., 2014;  
84 Tabachnick, 2016). The nucleotide sequence information of specific viruses holds importance,  
85 as it can provide insights into the underlying pathogenic mechanisms (Bartoszewicz, Genske,  
86 et al., 2021). By identifying these pathogenic viruses early, we are enabled to establish more

87 effective monitoring and early warning systems. Drawing on the global dataset of arboviruses  
88 and ISVs compiled by Huang et al. (Y. Huang et al., 2023), we curated a dataset  
89 encompassing viruses transmitted by hematophagous arthropods, along with their associated  
90 epidemiological data. In parallel, we created another dataset by utilizing the pathogenic  
91 functionalities within viral sequences discerned by SeqScreen (Balaji et al., 2022). Employing  
92 these two datasets and leveraging the XGBoost algorithm within an ensemble learning  
93 framework, regression and classification models were developed. Our aim was to identify the  
94 human pathogenicity of arboviruses and evaluate the zoonotic spillover risk for earlier public  
95 health prevention and control.

96

97

## 98 **Materials and methods**

### 99 **Database restructuring and epidemiological feature retrieval**

100 The database initially comprised 101,094 virus sequences sourced from NCBI and GenBank,  
101 covering the period from March 11, 1991, to January 28, 2023 (Y. Huang et al., 2023). We  
102 then compiled a table of 11 species of hematophagous arthropods, including mosquitoes, ticks,  
103 and sand flies, while excluding non-blood-feeding species such as *Tipulidae* and  
104 *Chironomidae* (Supplementary Table 1). To enhance precision and specificity, a stringent  
105 screening process was applied, systematically excluding records that lacking host information,  
106 sampling location details, as well as those with ambiguous vector-host relationships or vectors  
107 originating from Antarctica. Following this screening process, we obtained a database focused  
108 on viruses transmitted by hematophagous arthropods. Additionally, we developed a Python  
109 script to extract detailed taxonomic information for non-vector hosts at the order, family, and  
110 genus levels. To facilitate the discernment of relative differences among vector hosts across  
111 different countries, we performed a logarithmic transformation on the counts of hosts (Figure  
112 1A). Moreover, to emphasize the primary non-vector hosts, those recorded fewer than 100  
113 times were aggregated into an “Others” category, yielding a total of 10 classifications (Figure  
114 1C).

115 Additional epidemiological features were added to the basic database to enhance our analysis.

116 Specifically, the geographical location of each arthropod vector was acquired from the World  
117 Population Review (<https://worldpopulationreview.com/continents>) to refine our geographical  
118 analysis. Subsequently, the Köppen climate classification was determined for each vector  
119 based on its location of discovery, using data sourced from the Weather and Climate website  
120 (<https://weatherandclimate.com/>) and the Mindat website (<https://www.mindat.org/>).  
121 Furthermore, the Baltimore classification data for the viruses were integrated into our  
122 database, sourced from the International Committee on Taxonomy of Viruses (ICTV)  
123 (<https://ictv.global/report/genome>).

124

### 125 **The development of a regression model for epidemiological characteristics**

126 After the screening process, we obtained a dataset of 8,366 records, each enriched with  
127 unique epidemiological characteristics. The dataset for the regression model was transformed  
128 using R, which included 294 viruses and 36 epidemiological characteristics (Supplementary  
129 Table 2). The XGBoost was used to develop regression models. The dataset was partitioned  
130 into training and validation sets at a ratio of 7.5:2.5. The model's independent variables  
131 consist of 36 epidemiological characteristics, with the dependent variable representing a  
132 binary indicator of human infection status (0 = no, 1 = yes). Considering that positive samples  
133 represented 55% of the total, adjustments were made to maintain the balance of the dataset  
134 during construction. The model was trained on the training set using specified parameters  
135 (Supplementary Table 3) and the optimal number of iterations was determined through 10-  
136 fold cross-validation. Following this, the final model was constructed. The effectiveness of  
137 the model was assessed by means of the validation set, using Mean Absolute Error (MAE)  
138 and  $R^2$  as the main evaluation metrics.

139

### 140 **The development of a classification model for viral sequence pathogenic functionality**

141 Pathogenic functionality information was obtained for 71,623 viral sequences through the  
142 annotation of the database using SeqScreen (Balaji et al., 2022). Among these, the  
143 pathogenicity function data of 228 viruses, which were carried by arthropod vectors and  
144 submitted to NCBI after 2022, were utilized as an external validation dataset for verification

145 of the model's prediction results. The remaining 71,395 viruses served as the training dataset  
146 for the classification model. Within the model dataset, data were allocated into training and  
147 testing sets at a 7.5:2.5 ratio. This model incorporates a total of 11 independent variables,  
148 including 10 pathogenic function features and sequence size. The dependent variable  
149 represents a binary indicator of human infection status (0 = no, 1 = yes). Owing to the  
150 disparity between positive and negative samples in the dataset (positivity rate of 79.68%), the  
151 sampling rate was adjusted to achieve balance. Subsequently, the model underwent training  
152 on the allocated training set using specified parameters (Supplementary Table 4), with the  
153 optimal number of iterations determined through 10-fold cross-validation. Furthermore, the  
154 Arbovirus Human Pathogen Prediction (AHPP) model was constructed utilizing the identified  
155 optimal iteration count. Precision and F1 score were used to evaluate the model's  
156 performance.

157 To predict the human pathogenicity of viruses within an external validation dataset, two  
158 distinct prediction models were employed. The outcomes of these predictions were then  
159 compared and validated to assess the capabilities of our models. Among these, the zoonotic  
160 rank model is designed to evaluate the zoonotic risk associated with viruses (Mollentze et al.,  
161 2021). According to this model, ratings of "High" and "Very high" indicate a significant risk  
162 of zoonosis, suggesting that the virus poses a considerable threat of cross-species transmission  
163 to humans. Conversely, ratings of "Medium" and "Low" suggest a lower likelihood of  
164 zoonotic risk.

165

166

## 167 **Results**

### 168 **Global distribution, diversity, and host interactions of hematophagous arthropod-borne** 169 **viruses**

170 This study curated a detailed dataset comprising 8,468 pairs of hematophagous vectors and  
171 viruses, elucidating their geographic distribution, diversity, and host interactions. In terms of  
172 distribution, the vectors fall into two principal classes: *Insecta* and *Arachnida*, across seven  
173 distinct families (Figure 1A). The dataset includes records from all six inhabited continents,

174 with the notable exception of Antarctica, covering 102 countries globally and representing 24  
175 diverse climate types (Figure 1B). Regarding the diversity among these vectors, the *Culicidae*  
176 family dominates with 5,445 sequences, representing 64% of the dataset. It is followed by the  
177 *Ixodidae* family, which comprises 2,703 sequences, representing 32%. The United States  
178 exhibits the greatest diversity and abundance of vectors, hosting representatives from five  
179 distinct families. China ranks second, with vectors from four families. Concerning virus  
180 records associated with vectors, the United States leads with 1,977 records, with Russia,  
181 China, and Japan sequentially trailing.

182 Concerning non-vector hosts, the dataset includes an additional 54,789 pairs of non-vector  
183 hosts and viruses, which fall into 15 distinct groups. Among these, humans are the most  
184 common, represented by 40,078 records, followed by *Artiodactyla* and *Aves*, which together  
185 account for nearly 20% of the total (Figure 1C). While most arboviruses and ISVs tend to  
186 associate with a singular non-vector host, exceptions such as the West Nile virus (WNV) and  
187 Tick-borne encephalitis virus (TBEV) from the *Flaviviridae* family demonstrate more  
188 extensive cross-host transmission, detected in nine non-vector host species. As the diversity of  
189 non-vector hosts a virus can infect increases, there is a notable trend toward a reduction in the  
190 number of virus species (Figure 1D). Specifically, viruses that infect only one host span ten  
191 different virus families, while those capable of infecting two to four hosts are limited to five  
192 families. Viruses with the capability to infect five to seven hosts are predominantly from the  
193 *Flaviviridae* and *Togaviridae* families. Furthermore, a marked correlation exists in the  
194 detection numbers among different viruses. This pattern is particularly evident among viruses  
195 from the *Togaviridae*, *Flaviviridae*, *Peribunyaviridae*, and *Phenuiviridae* families, which are  
196 often co-detected (Figure S1). Such findings highlight the complex interrelationships and  
197 dynamics within virus-vector host interactions.

198

### 199 **Human pathogenicity of hematophagous arthropod vector-borne viruses: a regression** 200 **analysis of epidemiological characteristics**

201 This section presents the dataset constructed for 294 viruses, which includes 36  
202 epidemiological characteristics grouped into three categories: characteristics inherent to the

203 virus, characteristics of vector hosts, and characteristics of non-vector hosts. The regression  
204 model developed herein exhibited strong performance on the test set, evidenced by a Mean  
205 Squared Error (MSE) of 2.3% and an  $R^2$  of 90.6%. These results suggest that the included  
206 variables are capable of significantly elucidating the factors contributing to the human  
207 pathogenicity of these viruses.

208 Our analysis reveals that the diversity of non-vector hosts for vector-borne viruses is  
209 significantly associated with increased human pathogenicity, surpassing the influence of both  
210 arthropod vector hosts and the viruses' inherent properties (Figure 2). This characteristic is  
211 emphasized by its prominent position in both the model's Gain and Cover metrics (Figure S2).  
212 *Perissodactyla* and *Carnivora*, as non-vector hosts, are particularly significant. The frequent  
213 detection of viruses in these species strongly correlates with a heightened risk of spillover  
214 events. Equally pivotal is the role of vector hosts. Viruses present in diverse vector genera are  
215 associated with heightened pathogenic risks. Ticks, for example, are known to transmit a  
216 significant number of harmful viruses. Furthermore, vector-borne viruses, especially those  
217 classified as arboviruses or within the *Flaviviridae* family, are significant in facilitating the  
218 transmission of diseases to humans.

219

## 220 **Human Pathogenicity and Pathogenic Function of Virus Sequences: A Classification** 221 **Approach.**

222 In our research, SeqScreen was employed to annotate the pathogenic functionality of all viral  
223 sequences within our database. Following the exclusion of sequences that failed to be  
224 successfully annotated, our dataset was refined to include a total of 71,623 sequences,  
225 encompassing both arboviruses and ISVs. Each characterized by pathogenic features, host  
226 information, and established zoonotic potential. Mosquito-borne arboviruses formed a  
227 significant portion of the dataset, with DENV-1 (9,194 sequences), DENV-2 (8,999  
228 sequences), and West Nile virus (WNV) (4,656 sequences) from the *Flaviviridae* family being  
229 the most prevalent. Tick-borne arboviruses were also well-represented, including African  
230 swine fever virus (ASFV) (3,915 sequences) from the *Asfarviridae* family and Crimean-  
231 Congo hemorrhagic fever orthonairovirus (CCHF) (3,771 sequences) from the *Nairoviridae*



232 family, also contributing a notable proportion to the dataset.

233 After screening an initial set of 32 features, ten distinct pathogenic features were identified  
234 within these sequences (Table 1). Among these, “Viral adhesion” emerged as the most  
235 prevalent, accounting for 62% (44,482 sequences) of the total. This function is crucial for the  
236 attachment of viruses to host cell surface receptors, marking the first step in the infection  
237 process that facilitates viral entry and sets the stage for further viral invasion and replication  
238 inside the cell. “Viral counter signaling” and “Host xenophagy” are also significant,  
239 accounting for 49% and 47% of the features, respectively, and are primarily associated with  
240 the virus’s immune evasion strategies. The former disrupts host immune signaling pathways  
241 to prevent inflammatory responses and other immune defenses, while the latter involves the  
242 virus’s interference with the host’s autophagic processes. Together, both features significantly  
243 prolong the virus’s survival time within host cells by protecting viral integrity.

244 Despite only 6.1% of the viral sequences in our dataset exhibiting “Viral invasion” (4,376),  
245 this feature is predominant among viruses without established zoonotic potential, surpassing  
246 the prevalence of the three previously mentioned pathogenic functions. A significant portion  
247 of these viruses, identified as ISVs, are mainly transmitted by arthropod vectors. However, a  
248 subset of these viruses has also been detected in *Artiodactyla*, *Perissodactyla*, and *Aves*  
249 (Figure 3A). In contrast, for viruses with known zoonotic potential, “viral adhesion,” “Viral  
250 counter-signaling,” and “Host xenophagy” emerge as the most prevalent pathogenic features.  
251 Contrasting with the viruses with non-established zoonotic potential, these viruses are  
252 predominantly associated with *Aves*, *Artiodactyla*, and *Rodentia* (Figure 3B).

253 A binary classification model, employing the XGBoost algorithm with 11 viral features—  
254 including pathogenic features and the genomic size (length) of the virus—was developed. The  
255 model exhibited robust performance metrics: an accuracy of 94.87%, precision of 96.81%,  
256 recall of 96.77%, and an F1 score of 96.79%. Furthermore, the Receiver Operating  
257 Characteristic (ROC) curve and the confusion matrix provide comprehensive insights into the  
258 model’s performance (Figure 4).

259 The evaluation of the classification model using test data reveals that “Viral adhesion”  
260 exhibits the highest average gain, highlighting its critical role in the model’s discernment of

261 pathogenic potential. “Host xenophagy” and “Viral invasion” closely follow, each  
262 significantly influencing assessments of human pathogenicity (Figure 5A). In terms of  
263 average coverage, “Viral invasion” and “Host ubiquitin” stand out as the most influential  
264 features, signifying their impact on the virus pathogenicity (Figure 5B). Further examination  
265 of the model’s weights demonstrates the significance of the genomic size of the viral  
266 sequence, highlighting its vital contribution to refining pathogenicity assessments (Figure 5C).  
267 SHAP (SHapley Additive exPlanations) was utilized to perform an in-depth analysis of the  
268 contributions of individual pathogenic features to human pathogenicity of viruses. Notably,  
269 the feature with the highest ranking, “Viral size”, exhibited variable impacts on human  
270 pathogenicity, lacking a consistent pattern. In contrast, “Viral adhesion” and “Host  
271 xenophagy,” while slightly less influential than “Viral size,” demonstrated a strong tendency  
272 to increase the likelihood of a virus being pathogenic to humans. Conversely, “Viral invasion”  
273 was associated with a decreased likelihood of contributing to human pathogenicity, indicating  
274 an inverse effect. Furthermore, other pathogenic features, such as “Host transcription” and  
275 “Host ubiquitin” were found to positively correlate with pathogenicity (Figure 6).  
276 Our interactive analysis delves into the complex interplay among pathogenic features.  
277 Specifically, a pronounced interaction between “Viral size” and “Viral counter signaling” was  
278 observed. However, this interaction does not present a clear trend regarding its impact on  
279 pathogenicity (Figure 7A). Furthermore, the coexistence of “Host xenophagy” and “Viral  
280 adhesion” within viral sequences significantly augments the likelihood of pathogenicity to  
281 humans, highlighting the critical role of their synergy in enhancing pathogenic potential  
282 (Figure 7B). Contrarily, “Viral invasion” and “Viral counter signaling” demonstrate a distinct  
283 interaction. While the presence of “Viral counter signaling” alone may suggest potential  
284 pathogenicity, the simultaneous presence of these two functions markedly decreases its  
285 human pathogenicity (Figure 7C). Similarly, while the present of “host xenophagy” along  
286 may increase the likelihood of viral pathogenicity, its concurrent occurrence with “viral  
287 adhesion” or “viral counter signaling” significantly mitigates this pathogenic potential (Figure  
288 s3).

289

290 **Predicting pathogenicity in external datasets using machine learning**

291 This study utilized an external validation dataset of 228 viral sequences to evaluate the  
292 zoonotic potential of viruses using two machine learning models. The first model analyses  
293 host range features encoded in virus genomes to identify those with zoonotic potential. The  
294 second model, Arbovirus Human Pathogen Prediction (AHPP), aims to detect viruses that are  
295 pathogenic to humans by focusing on sequence functional information.

296 Predictive analysis of the zoonotic risk associated with all 64 distinct types of arboviruses and  
297 ISVs in the dataset revealed that 11 viruses were classified as having a “Very High” risk of  
298 zoonosis, 32 were “High”, and the remaining 21 were categorized as “Medium” and “Low”,  
299 indicating a lower likelihood of emerging as zoonotic pathogens (Supplementary Table 4).

300 The AHPP model identified 11 strains from 5 viruses as potentially pathogenic to humans. In  
301 our database, among the viruses already known to affect humans, one strain of JEV and  
302 Bunyamwera virus (BUNV), 8 of 25 strains of Severe fever with thrombocytopenia syndrome  
303 virus (SFTSV) were predicted to be pathogenic to humans. Our model indicates that, despite  
304 being classified potentially as possible arboviruses, Palma virus and Zaliv Terpeniya virus  
305 (ZTV) may have the capacity to infect humans. The lack of current research confirming the  
306 ability of these viruses to infect humans highlights a possible gap in our understanding of  
307 their zoonotic risk. There are significant differences in the evaluations of pathogenicity for  
308 Ebinur Lake virus (EBIV) between the two models. Classified within the *Orthobunyavirus*  
309 genus, EBIV was assigned a “Very High” zoonotic potential rank by the first model. In  
310 contrast, the AHPP analysis of all 25 EBIV sequences in this dataset did not identify any  
311 pathogenic features, suggesting a low likelihood of EBIV posing a pathogenic threat to  
312 humans. Additionally, the AHPP model’s analysis revealed that the five strains of Nairobi  
313 sheep disease virus (NSDV), three strains of Restan virus (RESV), and Tataguine virus  
314 (TATV) present in this dataset exhibit no pathogenic features, thereby suggesting a  
315 diminished probability of these viruses infecting humans and causing disease. However,  
316 previous detections of NSDV, RESV, and TATV in human blood samples have suggested a  
317 considerable zoonotic potential for these viruses. The Zoonotic Rank model also highlight  
318 both RESV and TATV as having high zoonotic potential, indicating a discernible discrepancy

319 between empirical observations and the model's predictions.

320

321

## 322 **Discussion**

323 The intricate interactions between hematophagous arthropods and the pathogenic viruses they  
324 harbor form a dynamic ecosystem with profound implications for public health. In recent  
325 decades, diseases transmitted by mosquitoes and ticks, such as ZIKAV and Jingmen tick virus  
326 (JMTV), have had significant social and economic impacts, underscoring the importance of  
327 monitoring and preventing the spread of potentially pathogenic viruses (Y.-J. S. Huang, Higgs,  
328 and Vanlandingham 2019b; Wu et al. 2023). Consequently, we have collected global data on  
329 vector-borne viruses from hematophagous arthropods and have developed XGBoost  
330 regression and classification prediction models to assess the pathogenicity of arboviruses and  
331 ISVs. This integration overcomes challenges associated with the traditional virological  
332 methods of virus isolation and cultivation. It facilitates the identification of key characteristics  
333 influencing viral pathogenicity and enhances our ability to predict viruses with potential  
334 zoonotic risks from viral sequences, thereby optimizing public health strategies and  
335 preventive measures.

336 In our dataset, the majority of arboviruses and ISVs are RNA viruses, predominantly  
337 consisting of dsRNA viruses categorized under Baltimore Group III. The distribution of these  
338 viruses is influenced by various factors; a detailed correlation analysis revealed significant  
339 correlations between most viruses and six key characteristics. These characteristics include  
340 the vector family and weather conditions, among others. Furthermore, within the community  
341 of vector-borne viruses, families such as *Flaviviridae*, *Togaviridae*, *Bunyaviridae*,  
342 *Rhabdoviridae*, and *Phenuiviridae* frequently co-occur and are considered part of the core  
343 virome (Coatsworth et al. 2022) (Figure supplement 2). Within the dynamic cycles of  
344 arboviruses and ISVs, numerous factors influence their transmission to humans and  
345 pathogenicity. Viral interactions with non-vector hosts are important drivers of viral evolution  
346 and are primarily responsible for zoonotic spillovers (Y.-J. S. Huang, Higgs, and  
347 Vanlandingham 2019a; Sen, Nayak, and De 2016). Research indicates that vectors' interaction

348 with avian hosts facilitates long-distance transmission, while interactions with vertebrates are  
349 pivotal determinants of spillovers (Forrester, Coffey, and Weaver 2014; García-Romero et al.  
350 2023; Stephenson et al. 2019). Our findings reveal that non-vector hosts significantly affect  
351 human pathogenicity, especially within *Perissodactyla* and *Carnivora*, where a high  
352 abundance of vector-borne viruses correlates with increased human pathogenicity. The  
353 characteristics of vector hosts are also essential in this context. A higher diversity of viruses  
354 within vectors may lead co-infections, thereby facilitating viral evolution and spillovers  
355 (Vogels et al. 2019). Hematophagous vectors and environmental changes further impact viral  
356 transmission and pathogenicity (Hermanns et al. 2023; Weissenböck et al. 2010). Moreover,  
357 the inherent characteristics of viruses influence their ability to cause disease. Specifically,  
358 most members of the *Flaviviridae* family are recognized as pathogenic to humans (Zhenzhen  
359 Zhang, Rong, and Li 2019).

360 Given that the genetic functionalities of viruses can predict their pathogenicity (Bartoszewicz,  
361 Seidel, and Renard 2021), in this study, we developed another XGBoost algorithm-based  
362 classification model, termed AHHP, to predict human pathogenicity based on the genetic  
363 functionalities of arboviruses and ISVs. The AHHP demonstrates superior performance,  
364 highlighting the significant contributions of individual viral functions to pathogenicity.  
365 Specifically, “Viral adhesion”, a crucial process facilitating viral infection and entry into host  
366 cells, markedly increases the pathogenicity of viruses to humans. For example, DENV ,  
367 WNV and ZIKAV from *Flaviviridae* family utilize their envelope (E) and capsid proteins to  
368 engage with receptor cells (Begum et al. 2019; Faustino et al. 2019; Cruz-Oliveira et al. 2015;  
369 Martins et al. 2019; Hasan et al. 2017). Similarly, the Chikungunya virus (CHIKV) from the  
370 *Togaviridae* family promotes fusion with receptor cells through its trimeric E1/E2 spikes  
371 (Ciota and Keyel 2019). Although “Viral invasion” serves a crucial role similar to “Viral  
372 adhesion” in the initial phase of viral entry, this feature is less prevalent in our dataset,  
373 appearing primarily in arboviruses and ISVs that are not currently pathogenic to humans.  
374 Despite efforts to balance the positive and negative samples during the training process, it was  
375 challenging to completely eliminate this influence. As a result, this feature was identified as a  
376 protective factor against viral pathogenicity in humans in our study. The interaction of this

377 feature with “Viral counter signaling” also suggests that its presence significantly inclines the  
378 virus towards non-pathogenicity. However, in the actual process of viral infection, these two  
379 processes can coexist. Therefore, these findings may indicate that the pathogenic mechanisms  
380 of vector-borne viruses could involve unique mechanisms. The function “Host xenophagy”  
381 and “Host transcription” enable viruses to maintain a prolonged presence within host cells,  
382 helping to facilitate the exploitation of cellular resources for replication and spread (King,  
383 Wegman, and Endy 2020). The feature “size” is not directly associated with pathogenic  
384 functions but is crucial for refining prediction outputs. Training the model using only 33  
385 functional features yielded an unreliable accuracy of 82% and a high false-positive rate.  
386 Including “size” significantly enhanced model performance. However, the influence of “size”  
387 on viral pathogenicity exhibits a random distribution trend, and interaction analysis also  
388 shows that its effect with “Viral counter signaling” lacks clear directionality. Overall, “size”  
389 fine-tunes the model’s predictions, and its integration with functional features leads to a more  
390 accurate assessment of the likelihood of pathogenicity to humans.

391 Hematophagous arthropod vector-borne viruses collected after 2022 were used as an external  
392 validation dataset to assess the predictive accuracy of the AHHP model, comparing it with  
393 another model, the Zoonotic Rank. Both models accurately identified the known  
394 arboviruses—SFTS, JEV, and BUNV—as strongly pathogenic to humans. All 25 strains of  
395 the SFTS virus were sourced from ticks in Miyazaki Prefecture, Japan, a region previously  
396 affected by two confirmed SFTS cases (Sato et al. 2021). Phylogenetic analysis revealed a  
397 high homology with a virus isolated from an SFTS patient, confirming a close genetic  
398 relationship. Similarly, a strain of JEV was isolated from mosquitoes in the Qinghai-Tibet  
399 Plateau of China (Li et al. 2011). Despite the region’s high altitude, the detection of antibodies  
400 in both the indigenous population and swine indicates localized virus transmission. BUNV  
401 was sourced from *Aedes ochraceus* mosquitoes in Desai, Garissa, Kenya (Kapuscinski et al.  
402 2021), and variants of this virus have been associated with large-scale outbreaks of african  
403 hemorrhagic fever (Gerrard et al. 2004). Given that BUNV can be transmitted through water,  
404 particular attention is warranted to its potential spread by female mosquitoes during  
405 oviposition (Turner and Christofferson 2024). In addition to well-recognized pathogenic, the

406 AHHP model predicted ZTV and Palma virus as potentially highly pathogenic arboviruses.  
407 ZTV was isolated from *Ixodes putus* and has been found in *Culex modestus*, suggesting  
408 potential cross-vector host transmission (Kapusinski et al. 2021). ZTV and SFTSV both  
409 belong to the *Bandavirus* genus. While the public health significance of ZTV is currently  
410 unclear, our research supports its classification as an arbovirus, and further pathogenicity  
411 testing is recommended (Palacios et al. 2013). Conversely, despite the Zoonotic Rank model  
412 considering it not to pose zoonotic potential, the AHHP model identified the Palma virus as  
413 potentially highly pathogenic based on its “Viral adhesion” and “Host cell death” features.  
414 However, there are some discrepancies between the predictions of the AHHP model and the  
415 Zoonotic Rank model. For example, EBIV, isolated from *Culex modestus*, can infect BALB/c  
416 mice and cause pronounced clinical symptoms (Zhao et al. 2020); it has also been shown that  
417 *Aedes aegypti* and *Hydrocoloeus minutus* can carry this virus, with antibodies detected in  
418 human serum samples (C. Yang et al. 2022). Yet, the absence of positive RT-PCR results  
419 currently hampers confirmation of its ability to infect and induce disease in human (Xia et al.  
420 2020). Furthermore, none of the 25 EBIV sequences analyzed in this study exhibited  
421 pathogenic functional, leading to their classification as non-pathogenic to humans. This  
422 suggests that further empirical research is necessary to verify the pathogenicity of arboviruses.  
423 Notably, the predictive results of the AHHP model diverged from known clinical observations  
424 in some instances. For example, the Nairobi Sheep Disease virus (NSDV) and Restan virus  
425 (RESV), both previously detected in humans, were classified as non-pathogenic in this study  
426 because no pathogenic functional were detected.  
427 In addition, our study has certain limitations. The dataset of global viruses used exhibits an  
428 uneven distribution, with certain viruses being overrepresented. This imbalance could  
429 introduce an unavoidable bias, potentially affecting the accuracy of our model. Additionally,  
430 our pathogenicity training, which is focused solely on the pathogenic functional features of  
431 viral sequences, may overlook other important features related to their pathogenicity. Also,  
432 variations in blood-feeding preferences among different hematophagous vectors can  
433 significantly influence both the transmission and pathogenicity of viruses. To enhance the  
434 robustness of future studies, it is crucial to incorporate a broader range of data that includes

435 these behavioral nuances.

436 In summary, our study identified the principal epidemiological factors influencing the  
437 pathogenicity of hematophagous arthropod vector-borne viruses. A machine learning  
438 predictive model was developed, revealing key features associated with viral pathogenicity  
439 and enabling the prediction of pathogenicity at the viral strain level. This model was  
440 evaluated alongside the Zoonotic Rank model using an additional validation dataset,  
441 demonstrating its reliability. We aim to apply this model more broadly to metagenomic results  
442 to explore potential pathogenic viruses within extensive data on hematophagous arthropod  
443 vectors. Such application could help mitigate current and future risks associated with vector-  
444 borne diseases.

445

446

#### 447 **Acknowledgement**

448 The authors acknowledge the global open dataset shared by Huang et al and Xuan Li for  
449 assistance with additional data collection. The laboratory is funded by a grant from National  
450 Key Research and Development Program of China (2019YFC1200501).

451

#### 452 **Data availability**

453 The data supporting the findings of this study are available upon reasonable request from the  
454 author. Researchers interested in accessing the dataset for further exploration or verification  
455 are encouraged to contact Huakai Hu at [hhyu98@163.com](mailto:hhyu98@163.com) for assistance. We are committed  
456 to promoting transparency and collaboration in scientific research, and we welcome inquiries  
457 regarding the data underlying our published results.

458

#### 459 **Author contribution**

460 Huakai Hu, Idea Generation, Data Curation and Transformation, Model Development and  
461 validation, Visualization, Writing – original draft, review and editing; Chaoying Zhao,  
462 Conceptualization, Methodology, Writing – review and editing; Jiali Chen, Conceptualization,



463 Methodology, Writing – review and editing; Meiling Jin, Conceptualization, Writing – review  
464 and editing; Hua Shi, Conceptualization, Writing – review and editing; Jinpeng Guo, Project  
465 administration, Writing – review and editing; Changjun Wang, Conceptualization,  
466 Methodology, Writing – review and editing; Yong Chen, Supervision, Funding acquisition,  
467 Project administration, Writing – review and editing;  
468  
469

## 470 **References**

- 471 Balaji A, Kille B, Kappell AD, Godbold GD, Diep M, Elworth RAL, Qian Z, Albin D, Nasko  
472 DJ, Shah N, Pop M, Segarra S, Ternus KL, Treangen TJ. 2022. SeqScreen: accurate  
473 and sensitive functional screening of pathogenic sequences via ensemble learning.  
474 *Genome Biol* **23**:133. doi:10.1186/s13059-022-02695-x
- 475 Bartoszewicz JM, Genske U, Renard BY. 2021a. Deep learning-based real-time detection of  
476 novel pathogens during sequencing. *Briefings in Bioinformatics* 22:bbab269.  
477 doi:10.1093/bib/bbab269
- 478 Bartoszewicz JM, Seidel A, Renard BY. 2021b. Interpretable detection of novel human  
479 viruses from genome sequencing data. *NAR Genomics and Bioinformatics* 3:lqab004.  
480 doi:10.1093/nargab/lqab004
- 481 Batson J, Dudas G, Haas-Stapleton E, Kistler AL, Li LM, Logan P, Ratnasiri K, Retallack H.  
482 2021. Single mosquito metatranscriptomics identifies vectors, emerging pathogens  
483 and reservoirs in one assay. *eLife* 10:e68353. doi:10.7554/eLife.68353
- 484 Begum F, Das S, Mukherjee D, Ray U. 2019. Hijacking the Host Immune Cells by Dengue  
485 Virus: Molecular Interplay of Receptors and Dengue Virus Envelope.  
486 *Microorganisms* 7:323. doi:10.3390/microorganisms7090323
- 487 Behl A, Nair A, Mohagaonkar S, Yadav P, Gambhir K, Tyagi N, Sharma RK, Butola BS,  
488 Sharma N. 2022. Threat, challenges, and preparedness for future pandemics: A  
489 descriptive review of phylogenetic analysis based predictions. *Infect Genet Evol*  
490 98:105217. doi:10.1016/j.meegid.2022.105217
- 491 Balaji A, Kille B, Kappell AD, Godbold GD, Diep M, Elworth RAL, Qian Z, Albin D, Nasko  
492 DJ, Shah N, Pop M, Segarra S, Ternus KL, Treangen TJ. 2022. SeqScreen: accurate  
493 and sensitive functional screening of pathogenic sequences via ensemble learning.  
494 *Genome Biol* 23:133. doi:10.1186/s13059-022-02695-x
- 495 Bartoszewicz JM, Genske U, Renard BY. 2021a. Deep learning-based real-time detection of  
496 novel pathogens during sequencing. *Briefings in Bioinformatics* 22:bbab269.  
497 doi:10.1093/bib/bbab269
- 498 Bartoszewicz JM, Seidel A, Renard BY. 2021b. Interpretable detection of novel human

- 499 viruses from genome sequencing data. *NAR Genomics and Bioinformatics* 3:lqab004.  
500 doi:10.1093/nargab/lqab004
- 501 Batson J, Dudas G, Haas-Stapleton E, Kistler AL, Li LM, Logan P, Ratnasiri K, Retallack H.  
502 2021. Single mosquito metatranscriptomics identifies vectors, emerging pathogens  
503 and reservoirs in one assay. *eLife* 10:e68353. doi:10.7554/eLife.68353
- 504 Begum F, Das S, Mukherjee D, Ray U. 2019. Hijacking the Host Immune Cells by Dengue  
505 Virus: Molecular Interplay of Receptors and Dengue Virus Envelope.  
506 *Microorganisms* 7:323. doi:10.3390/microorganisms7090323
- 507 Behl A, Nair A, Mohagaonkar S, Yadav P, Gambhir K, Tyagi N, Sharma RK, Butola BS,  
508 Sharma N. 2022. Threat, challenges, and preparedness for future pandemics: A  
509 descriptive review of phylogenetic analysis based predictions. *Infect Genet Evol*  
510 98:105217. doi:10.1016/j.meegid.2022.105217
- 511 Birnberg L, Temmam S, Aranda C, Correa-Fiz F, Talavera S, Bigot T, Eloit M, Busquets N.  
512 2020. Viromics on Honey-Baited FTA Cards as a New Tool for the Detection of  
513 Circulating Viruses in Mosquitoes. *Viruses* 12:274. doi:10.3390/v12030274
- 514 Brinkmann A, Nitsche A, Kohl C. 2016. Viral Metagenomics on Blood-Feeding Arthropods as  
515 a Tool for Human Disease Surveillance. *International Journal of Molecular Sciences*  
516 17:1743. doi:10.3390/ijms17101743
- 517 Calisher CH, Higgs S. 2018. The Discovery of Arthropod-Specific Viruses in Hematophagous  
518 Arthropods: An Open Door to Understanding the Mechanisms of Arbovirus and  
519 Arthropod Evolution? *Annual Review of Entomology* 63:87–103.  
520 doi:10.1146/annurev-ento-020117-043033
- 521 Ciota AT, Keyel AC. 2019. The Role of Temperature in Transmission of Zoonotic Arboviruses.  
522 *Viruses* 11:1013. doi:10.3390/v11111013
- 523 Coatsworth H, Bozic J, Carrillo J, Buckner EA, Rivers AR, Dinglasan RR, Mathias DK. 2022.  
524 Intrinsic variation in the vertically transmitted core virome of the mosquito *Aedes*  
525 *aegypti*. *Molecular Ecology* 31:2545–2561. doi:10.1111/mec.16412
- 526 Conway MJ, Colpitts TM, Fikrig E. 2014. Role of the Vector in Arbovirus Transmission.  
527 *Annu Rev Virol* 1:71–88. doi:10.1146/annurev-virology-031413-085513

- 528 Cruz-Oliveira C, Freire JM, Conceição TM, Higa LM, Castanho MARB, Da Poian AT. 2015.  
529 Receptors and routes of dengue virus entry into the host cells. *FEMS Microbiology*  
530 *Reviews* 39:155–170. doi:10.1093/femsre/fuu004
- 531 Cuthbert RN, Darriet F, Chabrierie O, Lenoir J, Courchamp F, Claeys C, Robert V, Jourdain F,  
532 Ulmer R, Diagne C, Ayala D, Simard F, Morand S, Renault D. 2023. Invasive  
533 hematophagous arthropods and associated diseases in a changing world. *Parasites &*  
534 *Vectors* 16:291. doi:10.1186/s13071-023-05887-x
- 535 Fang Z, Tan J, Wu S, Li M, Xu C, Xie Z, Zhu H. 2019. PPR-Meta: a tool for identifying  
536 phages and plasmids from metagenomic fragments using deep learning. *GigaScience*  
537 8:giz066. doi:10.1093/gigascience/giz066
- 538 Faustino AF, Martins AS, Karguth N, Artilheiro V, Enguita FJ, Ricardo JC, Santos NC,  
539 Martins IC. 2019. Structural and Functional Properties of the Capsid Protein of  
540 Dengue and Related Flavivirus. *International Journal of Molecular Sciences* 20:3870.  
541 doi:10.3390/ijms20163870
- 542 Forrester NL, Coffey LL, Weaver SC. 2014. Arboviral Bottlenecks and Challenges to  
543 Maintaining Diversity and Fitness during Mosquito Transmission. *Viruses* 6:3991–  
544 4004. doi:10.3390/v6103991
- 545 Fournet N, Voiry N, Rozenberg J, Bassi C, Cassonnet C, Karch A, Durand G, Grard G,  
546 Modenesi G, Lakoussan S-B, Tayliam N, Zatta M, Gallien S, investigation team, Noël  
547 H, Brichler S, Tarantola A. 2023. A cluster of autochthonous dengue transmission in  
548 the Paris region - detection, epidemiology and control measures, France, October  
549 2023. *Euro Surveill* 28. doi:10.2807/1560-7917.ES.2023.28.49.2300641
- 550 García-Romero C, Carrillo Bilbao GA, Navarro J-C, Martin-Solano S, Saegerman C. 2023.  
551 Arboviruses in Mammals in the Neotropics: A Systematic Review to Strengthen  
552 Epidemiological Monitoring Strategies and Conservation Medicine. *Viruses* 15:417.  
553 doi:10.3390/v15020417
- 554 Geoghegan JL, Holmes EC. 2018. The phylogenomics of evolving virus virulence. *Nat Rev*  
555 *Genet* 19:756–769. doi:10.1038/s41576-018-0055-5
- 556 Gerrard SR, Li L, Barrett AD, Nichol ST. 2004. Ngari virus is a Bunyamwera virus

- 557 reassortant that can be associated with large outbreaks of hemorrhagic fever in Africa.  
558 J Virol 78:8922–8926. doi:10.1128/JVI.78.16.8922-8926.2004
- 559 Gould E, Pettersson J, Higgs S, Charrel R, de Lamballerie X. 2017. Emerging arboviruses:  
560 Why today? One Health 4:1–13. doi:10.1016/j.onehlt.2017.06.001
- 561 Hasan SS, Miller A, Sapparapu G, Fernandez E, Klose T, Long F, Fokine A, Porta JC, Jiang W,  
562 Diamond MS, Crowe Jr. JE, Kuhn RJ, Rossmann MG. 2017. A human antibody  
563 against Zika virus crosslinks the E protein to prevent infection. Nat Commun 8:14722.  
564 doi:10.1038/ncomms14722
- 565 Hermanns K, Marklewitz M, Zirkel F, Kopp A, Kramer-Schadt S, Junglen S. 2023. Mosquito  
566 community composition shapes virus prevalence patterns along anthropogenic  
567 disturbance gradients. eLife 12:e66550. doi:10.7554/eLife.66550
- 568 Huang Y, Wang S, Liu H, Atoni E, Wang F, Chen W, Li Z, Rodriguez S, Yuan Z, Ming Z, Xia  
569 H. 2023. A global dataset of sequence, diversity and biosafety recommendation of  
570 arbovirus and arthropod-specific virus. Sci Data 10:305. doi:10.1038/s41597-023-  
571 02226-8
- 572 Huang Yan-Jang S., Higgs S, Vanlandingham DL. 2019. Arbovirus-Mosquito Vector-Host  
573 Interactions and the Impact on Transmission and Disease Pathogenesis of Arboviruses.  
574 Frontiers in Microbiology 10.
- 575 Huang Yan-Jang S, Higgs S, Vanlandingham DL. 2019. Emergence and re-emergence of  
576 mosquito-borne arboviruses. Current Opinion in Virology, Emerging viruses:  
577 intraspecies transmission • Viral Immunology 34:104–109.  
578 doi:10.1016/j.coviro.2019.01.001
- 579 Kampen H, Werner D. 2014. Out of the bush: the Asian bush mosquito *Aedes japonicus*  
580 *japonicus* (Theobald, 1901) (Diptera, Culicidae) becomes invasive. Parasit Vectors  
581 7:59. doi:10.1186/1756-3305-7-59
- 582 Kapuscinski ML, Bergren NA, Russell BJ, Lee JS, Borland EM, Hartman DA, King DC,  
583 Hughes HR, Burkhalter KL, Kading RC, Stenglein MD. 2021. Genomic  
584 characterization of 99 viruses from the bunyavirus families Nairoviridae,  
585 Peribunyaviridae, and Phenuiviridae, including 35 previously unsequenced viruses.

- 586 PLoS Pathog 17:e1009315. doi:10.1371/journal.ppat.1009315
- 587 Khongwichit S, Chuchaona W, Vongpunsawad S, Poovorawan Y. 2023. Molecular  
588 epidemiology, clinical analysis, and genetic characterization of Zika virus infections  
589 in Thailand (2020-2023). *Sci Rep* 13:21030. doi:10.1038/s41598-023-48508-4
- 590 King CA, Wegman AD, Endy TP. 2020. Mobilization and Activation of the Innate Immune  
591 Response to Dengue Virus. *Frontiers in Cellular and Infection Microbiology* 10.
- 592 Lewis WH, Tahon G, Geesink P, Sousa DZ, Ettema TJG. 2021. Innovations to culturing the  
593 uncultured microbial majority. *Nat Rev Microbiol* 19:225–240. doi:10.1038/s41579-  
594 020-00458-8
- 595 Li Y-X, Li M-H, Fu S-H, Chen W-X, Liu Q-Y, Zhang H-L, Da W, Hu S-L, La Mu SD, Bai J,  
596 Yin Z-D, Jiang H-Y, Guo Y-H, Ji DZD, Xu H-M, Li G, Mu GGC, Luo H-M, Wang J-  
597 L, Wang J, Ye X-M, Jin ZMY, Zhang W, Ning G-J, Wang H-Y, Li G-C, Yong J, Liang  
598 X-F, Liang G-D. 2011. Japanese Encephalitis, Tibet, China. *Emerg Infect Dis* 17:934–  
599 936. doi:10.3201/eid1705.101417
- 600 Martins AS, Carvalho FA, Faustino AF, Martins IC, Santos NC. 2019. West Nile Virus Capsid  
601 Protein Interacts With Biologically Relevant Host Lipid Systems. *Frontiers in*  
602 *Cellular and Infection Microbiology* 9.
- 603 Mollentze N, Babayan SA, Streicker DG. n.d. Identifying and prioritizing potential human-  
604 infecting viruses from their genome sequences. *PLOS BIOLOGY* 25.
- 605 Ni X-B, Cui X-M, Liu J-Y, Ye R-Z, Wu Y-Q, Jiang J-F, Sun Y, Wang Q, Shum MH-H, Chang  
606 Q-C, Zhao L, Han X-H, Ma K, Shen S-J, Zhang M-Z, Guo W-B, Zhu J-G, Zhan L, Li  
607 L-J, Ding S-J, Zhu D-Y, Zhang J, Xia L-Y, Oong X-Y, Ruan X-D, Shao H-Z, Que T-C,  
608 Liu G-Y, Du C-H, Huang E-J, Wang X, Du L-F, Wang C-C, Shi W-Q, Pan Y-S, Zhou  
609 Y-H, Qu J-L, Ma J, Gong C-W, Chen Q-Q, Qin Q, Tick Genome and Microbiome  
610 Consortium (TIGMIC), Lam TT-Y, Jia N, Cao W-C. 2023. Metavirome of 31 tick  
611 species provides a compendium of 1,801 RNA virus genomes. *Nat Microbiol* 8:162–  
612 173. doi:10.1038/s41564-022-01275-w
- 613 Nouri S, Matsumura EE, Kuo Y-W, Falk BW. 2018. Insect-specific viruses: from discovery to  
614 potential translational applications. *Current Opinion in Virology*, Virus vector

615 interactions • Special Section: Multicomponent viral systems 33:33–41.  
616 doi:10.1016/j.coviro.2018.07.006

617 Palacios G, Savji N, Travassos da Rosa A, Guzman H, Yu X, Desai A, Rosen GE, Hutchison S,  
618 Lipkin WI, Tesh R. 2013. Characterization of the Uukuniemi virus group  
619 (Phlebovirus: Bunyaviridae): evidence for seven distinct species. *J Virol* 87:3187–  
620 3195. doi:10.1128/JVI.02719-12

621 Roth GA, Abate D, Abate KH, Abay SM, Abbafati C, Abbasi N, Abbastabar H, Abd-Allah F,  
622 Abdela J, Abdelalim A, Abdollahpour I, Abdulkader RS, Abebe HT, Abebe M, Abebe  
623 Z, Abejie AN, Abera SF, Abil OZ, Abraha HN, Abrham AR, Abu-Raddad LJ,  
624 Accrombessi MMK, Acharya D, Adamu AA, Adebayo OM, Adedoyin RA,  
625 Adekanmbi V, Adetokunboh OO, Adhena BM, Adib MG, Admasie A, Afshin A,  
626 Agarwal G, Agesa KM, Agrawal A, Agrawal S, Ahmadi A, Ahmadi M, Ahmed MB,  
627 Ahmed S, Aichour AN, Aichour I, Aichour MTE, Akbari ME, Akinyemi RO, Akseer  
628 N, Al-Aly Z, Al-Eyadhy A, Al-Raddadi RM, Alahdab F, Alam K, Alam T, Alebel A,  
629 Alene KA, Alijanzadeh M, Alizadeh-Navaei R, Aljunid SM, Alkerwi A, Alla F,  
630 Allebeck P, Alonso J, Altirkawi K, Alvis-Guzman N, Amare AT, Aminde LN, Amini E,  
631 Ammar W, Amoako YA, Anber NH, Andrei CL, Androudi S, Animut MD, Anjomshoa  
632 M, Ansari H, Ansha MG, Antonio CAT, Anwari P, Aremu O, Ärnlöv J, Arora A, Arora  
633 M, Artaman A, Aryal KK, Asayesh H, Asfaw ET, Ataro Z, Atique S, Atre SR, Ausloos  
634 M, Avokpaho EFGA, Awasthi A, Quintanilla BPA, Ayele Y, Ayer R, Azzopardi PS,  
635 Babazadeh A, Bacha U, Badali H, Badawi A, Bali AG, Ballesteros KE, Banach M,  
636 Banerjee K, Bannick MS, Banoub JAM, Barboza MA, Barker-Collo SL,  
637 Bärnighausen TW, Barquera S, Barrero LH, Bassat Q, Basu S, Baune BT, Baynes HW,  
638 Bazargan-Hejazi S, Bedi N, Beghi E, Behzadifar Masoud, Behzadifar Meysam, Béjot  
639 Y, Bekele BB, Belachew AB, Belay E, Belay YA, Bell ML, Bello AK, Bennett DA,  
640 Bensenor IM, Berman AE, Bernabe E, Bernstein RS, Bertolacci GJ, Beuran M,  
641 Beyranvand T, Bhalla A, Bhattarai S, Bhaumik S, Bhutta ZA, Biadgo B, Biehl MH,  
642 Bijani A, Bikbov B, Bilano V, Bililign N, Bin Sayeed MS, Bisanzio D, Biswas T,  
643 Blacker BF, Basara BB, Borschmann R, Bosetti C, Bozorgmehr K, Brady OJ, Brant

644 LC, Brayne C, Brazinova A, Breitborde NJK, Brenner H, Briant PS, Britton G,  
645 Brugha T, Busse R, Butt ZA, Callender CSKH, Campos-Nonato IR, Campuzano  
646 Rincon JC, Cano J, Car M, Cárdenas R, Carreras G, Carrero JJ, Carter A, Carvalho F,  
647 Castañeda-Orjuela CA, Castillo Rivas J, Castle CD, Castro C, Castro F, Catalá-López  
648 F, Cerin E, Chaiah Y, Chang J-C, Charlson FJ, Chaturvedi P, Chiang PP-C, Chimed-  
649 Ochir O, Chisumpa VH, Chitheer A, Chowdhury R, Christensen H, Christopher DJ,  
650 Chung S-C, Cicuttini FM, Ciobanu LG, Cirillo M, Cohen AJ, Cooper LT, Cortesi PA,  
651 Cortinovis M, Cousin E, Cowie BC, Criqui MH, Cromwell EA, Crowe CS, Crump  
652 JA, Cunningham M, Daba AK, Dadi AF, Dandona L, Dandona R, Dang AK, Dargan  
653 PI, Daryani A, Das SK, Gupta RD, Neves JD, Dasa TT, Dash AP, Davis AC, Davis  
654 Weaver N, Davitoiu DV, Davletov K, De La Hoz FP, De Neve J-W, Degefa MG,  
655 Degenhardt L, Degfie TT, Deiparine S, Demoz GT, Demtsu BB, Denova-Gutiérrez E,  
656 Deribe K, Dervenis N, Des Jarlais DC, Dessie GA, Dey S, Dharmaratne SD, Dicker  
657 D, Dinberu MT, Ding EL, Dirac MA, Djalalinia S, Dokova K, Doku DT, Donnelly  
658 CA, Dorsey ER, Doshi PP, Douwes-Schultz D, Doyle KE, Driscoll TR, Dubey M,  
659 Dubljanin E, Duken EE, Duncan BB, Duraes AR, Ebrahimi H, Ebrahimpour S,  
660 Edessa D, Edvardsson D, Eggen AE, El Bcheraoui C, El Sayed Zaki M, El-Khatib Z,  
661 Elkout H, Ellingsen CL, Endres M, Endries AY, Er B, Erskine HE, Eshrati B,  
662 Eskandarieh S, Esmaeili R, Esteghamati A, Fakhar M, Fakhim H, Faramarzi M,  
663 Fareed M, Farhadi F, Farinha CSES, Faro A, Farvid MS, Farzadfar F, Farzaei MH,  
664 Feigin VL, Feigl AB, Fentahun N, Fereshtehnejad S-M, Fernandes E, Fernandes JC,  
665 Ferrari AJ, Feyissa GT, Filip I, Finegold S, Fischer F, Fitzmaurice C, Foigt NA,  
666 Foreman KJ, Fornari C, Frank TD, Fukumoto T, Fuller JE, Fullman N, Fürst T,  
667 Furtado JM, Futran ND, Gallus S, Garcia-Basteiro AL, Garcia-Gordillo MA, Gardner  
668 WM, Gebre AK, Gebrehiwot TT, Gebremedhin AT, Gebremichael B, Gebremichael  
669 TG, Gelano TF, Geleijnse JM, Genova-Maleras R, Geramo YCD, Gething PW, Gezae  
670 KE, Ghadami MR, Ghadimi R, Ghasemi Falavarjani K, Ghasemi-Kasman M,  
671 Ghimire M, Gibney KB, Gill PS, Gill TK, Gillum RF, Ginawi IA, Giroud M,  
672 Giussani G, Goenka S, Goldberg EM, Goli S, Gómez-Dantés H, Gona PN, Gopalani



673 SV, Gorman TM, Goto A, Goulart AC, Gnedovskaya EV, Grada A, Grosso G,  
674 Gugnani HC, Guimaraes ALS, Guo Y, Gupta PC, Gupta Rahul, Gupta Rajeev, Gupta  
675 T, Gutiérrez RA, Gyawali B, Haagsma JA, Hafezi-Nejad N, Hagos TB, Hailegiyorgis  
676 TT, Hailu GB, Haj-Mirzaian Arvin, Haj-Mirzaian Arya, Hamadeh RR, Hamidi S,  
677 Handal AJ, Hankey GJ, Harb HL, Harikrishnan S, Haro JM, Hasan M, Hassankhani  
678 H, Hassen HY, Havmoeller R, Hay RJ, Hay SI, He Y, Hedayatizadeh-Omran A,  
679 Hegazy MI, Heibati B, Heidari M, Hendrie D, Henok A, Henry NJ, Herteliu C,  
680 Heydarpour F, Heydarpour P, Heydarpour S, Hibstu DT, Hoek HW, Hole MK,  
681 Homaie Rad E, Hoogar P, Hosgood HD, Hosseini SM, Hosseinzadeh M, Hostiuc M,  
682 Hostiuc S, Hotez PJ, Hoy DG, Hsiao T, Hu G, Huang JJ, Hussein A, Hussen MM,  
683 Hutfless S, Idrisov B, Ilesanmi OS, Iqbal U, Irvani SSN, Irvine CMS, Islam N, Islam  
684 SMS, Islami F, Jacobsen KH, Jahangiry L, Jahanmehr N, Jain SK, Jakovljevic M,  
685 Jalu MT, James SL, Javanbakht M, Jayatilleke AU, Jeemon P, Jenkins KJ, Jha RP, Jha  
686 V, Johnson CO, Johnson SC, Jonas JB, Joshi A, Jozwiak JJ, Jungari SB, Jürisson M,  
687 Kabir Z, Kadel R, Kahsay A, Kalani R, Karami M, Karami Matin B, Karch A,  
688 Karema C, Karimi-Sari H, Kasaeian A, Kassa DH, Kassa GM, Kassa TD, Kassebaum  
689 NJ, Katikireddi SV, Kaul A, Kazemi Z, Karyani AK, Kazi DS, Kefale AT, Keiyoro  
690 PN, Kemp GR, Kengne AP, Keren A, Kesavachandran CN, Khader YS, Khafaei B,  
691 Khafaie MA, Khajavi A, Khalid N, Khalil IA, Khan EA, Khan MS, Khan MA, Khang  
692 Y-H, Khater MM, Khoja AT, Khosravi A, Khosravi MH, Khubchandani J, Kiadaliri  
693 AA, Kibret GD, Kidanemariam ZT, Kiirithio DN, Kim D, Kim Y-E, Kim YJ,  
694 Kimokoti RW, Kinfu Y, Kisa A, Kissimova-Skarbek K, Kivimäki M, Knudsen AKS,  
695 Kocarnik JM, Kochhar S, Kokubo Y, Kolola T, Kopec JA, Koul PA, Koyanagi A,  
696 Kravchenko MA, Krishan K, Kuate Defo B, Kucuk Bicer B, Kumar GA, Kumar M,  
697 Kumar P, Kutz MJ, Kuzin I, Kyu HH, Lad DP, Lad SD, Lafranconi A, Lal DK, Lalloo  
698 R, Lallukka T, Lam JO, Lami FH, Lansingh VC, Lansky S, Larson HJ, Latifi A, Lau  
699 KM-M, Lazarus JV, Lebedev G, Lee PH, Leigh J, Leili M, Leshargie CT, Li S, Li Y,  
700 Liang J, Lim L-L, Lim SS, Limenih MA, Linn S, Liu S, Liu Y, Lodha R, Lonsdale C,  
701 Lopez AD, Lorkowski S, Lotufo PA, Lozano R, Lunevicius R, Ma S, Macarayan

702 ERK, Mackay MT, MacLachlan JH, Maddison ER, Madotto F, Magdy Abd El Razek  
703 H, Magdy Abd El Razek M, Maghavani DP, Majdan M, Majdzadeh R, Majeed A,  
704 Malekzadeh R, Malta DC, Manda A-L, Mandarano-Filho LG, Manguerra H,  
705 Mansournia MA, Mapoma CC, Marami D, Maravilla JC, Marcenes W, Marczak L,  
706 Marks A, Marks GB, Martinez G, Martins-Melo FR, Martopullo I, März W, Marzan  
707 MB, Masci JR, Massenburg BB, Mathur MR, Mathur P, Matzopoulos R, Maulik PK,  
708 Mazidi M, McAlinden C, McGrath JJ, McKee M, McMahan BJ, Mehata S,  
709 Mehndiratta MM, Mehrotra R, Mehta KM, Mehta V, Mekonnen TC, Melese A,  
710 Melku M, Memiah PTN, Memish ZA, Mendoza W, Mengistu DT, Mengistu G,  
711 Mensah GA, Mereta ST, Meretoja A, Meretoja TJ, Mestrovic T, Mezgebe HB,  
712 Miazgowski B, Miazgowski T, Milllear AI, Miller TR, Miller-Petrie MK, Mini GK,  
713 Mirabi P, Mirarefin M, Mirica A, Mirrakhimov EM, Misganaw AT, Mitiku H, Moazen  
714 B, Mohammad KA, Mohammadi M, Mohammadifard N, Mohammed MA,  
715 Mohammed S, Mohan V, Mokdad AH, Molokhia M, Monasta L, Moradi G, Moradi-  
716 Lakeh M, Moradinazar M, Moraga P, Morawska L, Moreno Velásquez I, Morgado-  
717 Da-Costa J, Morrison SD, Moschos MM, Mouodi S, Mousavi SM, Muchie KF,  
718 Mueller UO, Mukhopadhyay S, Muller K, Mumford JE, Musa J, Musa KI, Mustafa G,  
719 Muthupandian S, Nachega JB, Nagel G, Naheed A, Nahvijou A, Naik G, Nair S,  
720 Najafi F, Naldi L, Nam HS, Nangia V, Nansseu JR, Nascimento BR, Natarajan G,  
721 Neamati N, Negoi I, Negoi RI, Neupane S, Newton CRJ, Ngalesoni FN, Ngunjiri JW,  
722 Nguyen AQ, Nguyen G, Nguyen Ha Thu, Nguyen Huong Thanh, Nguyen LH,  
723 Nguyen M, Nguyen TH, Nichols E, Ningrum DNA, Nirayo YL, Nixon MR,  
724 Nolutshungu N, Nomura S, Norheim OF, Noroozi M, Norrving B, Noubiap JJ, Nouri  
725 HR, Nourollahpour Shiadeh M, Nowroozi MR, Nyasulu PS, Odell CM, Ofori-Asenso  
726 R, Ogbo FA, Oh I-H, Oladimeji O, Olagunju AT, Olivares PR, Olsen HE, Olusanya  
727 BO, Olusanya JO, Ong KL, Ong SKS, Oren E, Orpana HM, Ortiz A, Ortiz JR,  
728 Otstavnov SS, Øverland S, Owolabi MO, Özdemiir R, P A M, Pacella R, Pakhale S,  
729 Pakhare AP, Pakpour AH, Pana A, Panda-Jonas S, Pandian JD, Parisi A, Park E-K,  
730 Parry CDH, Parsian H, Patel S, Pati S, Patton GC, Paturi VR, Paulson KR, Pereira A,

731 Pereira DM, Perico N, Pesudovs K, Petzold M, Phillips MR, Piel FB, Pigott DM,  
732 Pillay JD, Pirsahab M, Pishgar F, Polinder S, Postma MJ, Pourshams A, Poustchi H,  
733 Pujar A, Prakash S, Prasad N, Purcell CA, Qorbani M, Quintana H, Quistberg DA,  
734 Rade KW, Radfar A, Rafay A, Rafiei A, Rahim F, Rahimi K, Rahimi-Movaghar A,  
735 Rahman M, Rahman MHU, Rahman MA, Rai RK, Rajsic S, Ram U, Ranabhat CL,  
736 Ranjan P, Rao PC, Rawaf DL, Rawaf S, Razo-García C, Reddy KS, Reiner RC,  
737 Reitsma MB, Remuzzi G, Renzaho AMN, Resnikoff S, Rezaei S, Rezaeian S, Rezai  
738 MS, Riahi SM, Ribeiro ALP, Rios-Blancas MJ, Roba KT, Roberts NLS, Robinson SR,  
739 Roever L, Ronfani L, Roshandel G, Rostami A, Rothenbacher D, Roy A, Rubagotti E,  
740 Sachdev PS, Saddik B, Sadeghi E, Safari H, Safdarian M, Safi S, Safiri S, Sagar R,  
741 Sahebkar A, Sahraian MA, Salam N, Salama JS, Salamati P, Saldanha RDF, Saleem Z,  
742 Salimi Y, Salvi SS, Salz I, Sambala EZ, Samy AM, Sanabria J, Sanchez-Niño MD,  
743 Santomauro DF, Santos IS, Santos JV, Milicevic MMS, Sao Jose BP, Sarker AR,  
744 Sarmiento-Suárez R, Sarrafzadegan N, Sartorius B, Sarvi S, Sathian B, Satpathy M,  
745 Sawant AR, Sawhney M, Saxena S, Sayyah M, Schaeffner E, Schmidt MI, Schneider  
746 IJC, Schöttker B, Schutte AE, Schwebel DC, Schwendicke F, Scott JG, Sekerija M,  
747 Sepanlou SG, Serván-Mori E, Seyedmousavi S, Shabaninejad H, Shackelford KA,  
748 Shafieesabet A, Shahbazi M, Shaheen AA, Shaikh MA, Shams-Beyranvand M,  
749 Shamsi M, Shamsizadeh M, Sharafi K, Sharif M, Sharif-Alhoseini M, Sharma R, She  
750 J, Sheikh A, Shi P, Shiferaw MS, Shigematsu M, Shiri R, Shirkoohi R, Shiue I,  
751 Shokraneh F, Shrimel MG, Si S, Siabani S, Siddiqi TJ, Sigfusdottir ID, Sigurvinsdottir  
752 R, Silberberg DH, Silva DAS, Silva JP, Silva NTD, Silveira DGA, Singh JA, Singh  
753 NP, Singh PK, Singh V, Sinha DN, Sliwa K, Smith M, Sobaih BH, Sobhani S,  
754 Sobngwi E, Soneji SS, Soofi M, Sorensen RJD, Soriano JB, Soyiri IN, Sposato LA,  
755 Sreeramareddy CT, Srinivasan V, Stanaway JD, Starodubov VI, Stathopoulou V, Stein  
756 DJ, Steiner C, Stewart LG, Stokes MA, Subart ML, Sudaryanto A, Sufiyan MB, Sur  
757 PJ, Sutradhar I, Sykes BL, Sylaja PN, Sylte DO, Szoeki CEI, Tabarés-Seisdedos R,  
758 Tabuchi T, Tadakamadla SK, Takahashi K, Tandon N, Tassew SG, Taveira N, Tehrani-  
759 Banihashemi A, Tekalign TG, Tekle MG, Temsah M-H, Temsah O, Terkawi AS,

760 Teshale MY, Tessema B, Tessema GA, Thankappan KR, Thirunavukkarasu S,  
761 Thomas N, Thrift AG, Thurston GD, Tilahun B, To QG, Tobe-Gai R, Tonelli M,  
762 Topor-Madry R, Torre AE, Tortajada-Girbés M, Touvier M, Tovani-Palone MR, Tran  
763 BX, Tran KB, Tripathi S, Troeger CE, Truelsen TC, Truong NT, Tsadik AG, Tsoi D,  
764 Tudor Car L, Tuzcu EM, Tyrovolas S, Ukwaja KN, Ullah I, Undurraga EA, Updike  
765 RL, Usman MS, Uthman OA, Uzun SB, Vaduganathan M, Vaezi A, Vaidya G, Valdez  
766 PR, Varavikova E, Vasankari TJ, Venketasubramanian N, Villafaina S, Violante FS,  
767 Vladimirov SK, Vlassov V, Vollset SE, Vos T, Wagner GR, Wagnew FS, Waheed Y,  
768 Wallin MT, Walson JL, Wang Y, Wang Y-P, Wassie MM, Weiderpass E, Weintraub  
769 RG, Weldegebreal F, Weldegewergs KG, Werdecker A, Werkneh AA, West TE,  
770 Westerman R, Whiteford HA, Widecka J, Wilner LB, Wilson S, Winkler AS,  
771 Wiysonge CS, Wolfe CDA, Wu S, Wu Y-C, Wyper GMA, Xavier D, Xu G, Yadgir S,  
772 Yadollahpour A, Yahyazadeh Jabbari SH, Yakob B, Yan LL, Yano Y, Yaseri M, Yasin  
773 YJ, Yentür GK, Yeshaneh A, Yimer EM, Yip P, Yirsaw BD, Yisma E, Yonemoto N,  
774 Yonga G, Yoon S-J, Yotebieng M, Younis MZ, Yousefifard M, Yu C, Zadnik V, Zaidi  
775 Z, Zaman SB, Zamani M, Zare Z, Zeleke AJ, Zenebe ZM, Zhang AL, Zhang K, Zhou  
776 M, Zodpey S, Zuhlke LJ, Naghavi M, Murray CJL. 2018. Global, regional, and  
777 national age-sex-specific mortality for 282 causes of death in 195 countries and  
778 territories, 1980–2017: a systematic analysis for the Global Burden of Disease Study  
779 2017. *The Lancet* 392:1736–1788. doi:10.1016/S0140-6736(18)32203-7

780 Sato Y, Mekata H, Sudaryatma PE, Kirino Y, Yamamoto S, Ando S, Sugimoto T, Okabayashi  
781 T. 2021. Isolation of Severe Fever with Thrombocytopenia Syndrome Virus from  
782 Various Tick Species in Area with Human Severe Fever with Thrombocytopenia  
783 Syndrome Cases. *Vector-Borne and Zoonotic Diseases* 21:378–384.  
784 doi:10.1089/vbz.2020.2720

785 Sen R, Nayak L, De RK. 2016. A review on host–pathogen interactions: classification and  
786 prediction. *Eur J Clin Microbiol Infect Dis* 35:1581–1599. doi:10.1007/s10096-016-  
787 2716-7

788 Stephenson EB, Murphy AK, Jansen CC, Peel AJ, McCallum H. 2019. Interpreting mosquito

- 789 feeding patterns in Australia through an ecological lens: an analysis of blood meal  
790 studies. *Parasites & Vectors* 12:156. doi:10.1186/s13071-019-3405-z
- 791 Tabachnick WJ. 2016. Climate Change and the Arboviruses: Lessons from the Evolution of  
792 the Dengue and Yellow Fever Viruses. *Annual Review of Virology* 3:125–145.  
793 doi:10.1146/annurev-virology-110615-035630
- 794 Touray M, Bakirci S, Ulug D, Gulsen SH, Cimen H, Yavasoglu SI, Simsek FM, Ertabaklar H,  
795 Ozbel Y, Hazir S. 2023. Arthropod vectors of disease agents: Their role in public and  
796 veterinary health in Turkiye and their control measures. *Acta Tropica* 243:106893.  
797 doi:10.1016/j.actatropica.2023.106893
- 798 Turner EA, Christofferson RC. 2024. Exploring the transmission modalities of Bunyamwera  
799 virus. *Exp Biol Med (Maywood)* 249:10114. doi:10.3389/ebm.2024.10114
- 800 Vector-borne diseases. n.d. [https://www.who.int/news-room/fact-sheets/detail/vector-borne-](https://www.who.int/news-room/fact-sheets/detail/vector-borne-diseases)  
801 [diseases](https://www.who.int/news-room/fact-sheets/detail/vector-borne-diseases)
- 802 Viglietta M, Bellone R, Blisnick AA, Failloux A-B. 2021. Vector Specificity of Arbovirus  
803 Transmission. *Frontiers in Microbiology* 12.
- 804 Vogels CBF, Rückert C, Cavany SM, Perkins TA, Ebel GD, Grubaugh ND. 2019. Arbovirus  
805 coinfection and co-transmission: A neglected public health concern? *PLOS Biology*  
806 17:e3000130. doi:10.1371/journal.pbio.3000130
- 807 Weaver SC, Charlier C, Vasilakis N, Lecuit M. 2018. Zika, Chikungunya, and Other  
808 Emerging Vector-Borne Viral Diseases. *Annu Rev Med* 69:395–408.  
809 doi:10.1146/annurev-med-050715-105122
- 810 Weissenböck H, Hubálek Z, Bakonyi T, Nowotny N. 2010. Zoonotic mosquito-borne  
811 flaviviruses: Worldwide presence of agents with proven pathogenicity and potential  
812 candidates of future emerging diseases. *Veterinary Microbiology* 140:271–280.  
813 doi:10.1016/j.vetmic.2009.08.025
- 814 Wu Z, Zhang M, Zhang Y, Lu K, Zhu W, Feng S, Qi J, Niu G. 2023. Jingmen tick virus: an  
815 emerging arbovirus with a global threat. *mSphere* 8:e00281-23.  
816 doi:10.1128/msphere.00281-23
- 817 Xia H, Liu R, Zhao L, Sun X, Zheng Z, Atoni E, Hu X, Zhang B, Zhang G, Yuan Z. 2020.

- 818 Characterization of Ebinur Lake Virus and Its Human Seroprevalence at the China–  
819 Kazakhstan Border. *Frontiers in Microbiology* 10.
- 820 Yang C, Wang F, Huang D, Ma H, Zhao L, Zhang G, Li H, Han Q, Bente D, Salazar FV, Yuan  
821 Z, Xia H. 2022. Vector competence and immune response of *Aedes aegypti* for Ebinur  
822 Lake virus, a newly classified mosquito-borne orthobunyavirus. *PLoS Negl Trop Dis*  
823 16:e0010642. doi:10.1371/journal.pntd.0010642
- 824 Yang X, Qin S, Liu X, Zhang N, Chen J, Jin M, Liu F, Wang Y, Guo J, Shi H, Wang C, Chen  
825 Y. 2023. Meta-Viromic Sequencing Reveals Virome Characteristics of Mosquitoes  
826 and Culicoides on Zhoushan Island, China. *Microbiol Spectr* e02688-22.  
827 doi:10.1128/spectrum.02688-22
- 828 Zaid A, Burt FJ, Liu X, Poo YS, Zandi K, Suhrbier A, Weaver SC, Texeira MM, Mahalingam  
829 S. 2021. Arthritogenic alphaviruses: epidemiological and clinical perspective on  
830 emerging arboviruses. *The Lancet Infectious Diseases* 21:e123–e133.  
831 doi:10.1016/S1473-3099(20)30491-6
- 832 Zhang Zheng, Cai Z, Tan Z, Lu C, Jiang T, Zhang G, Peng Y. 2019. Rapid identification of  
833 human - infecting viruses. *Transbound Emerg Dis* 66:2517 – 2522.  
834 doi:10.1111/tbed.13314
- 835 Zhang Zhenzhen, Rong L, Li Y-P. 2019. Flaviviridae Viruses and Oxidative Stress:  
836 Implications for Viral Pathogenesis. *Oxid Med Cell Longev* 2019:1409582.  
837 doi:10.1155/2019/1409582
- 838 Zhao L, Luo H, Huang D, Yu P, Dong Q, Mwaliko C, Atoni E, Nyaruaba R, Yuan J, Zhang G,  
839 Bente D, Yuan Z, Xia H. 2020. Pathogenesis and Immune Response of Ebinur Lake  
840 Virus: A Newly Identified Orthobunyavirus That Exhibited Strong Virulence in Mice.  
841 *Front Microbiol* 11:625661. doi:10.3389/fmicb.2020.625661
- 842 Zhao L, Yu P, Shi C, Jia L, Evans A, Wang X, Wu Q, Xiong G, Ming Z, Salazar F, Agwanda B,  
843 Bente D, Wang F, Liu D, Yuan Z, Xia H. 2022. Global mosquito virome profiling and  
844 mosquito spatial diffusion pathways revealed by marker-viruses (preprint).  
845 *Microbiology*. doi:10.1101/2022.09.24.509300  
846

847 **Table 1: Pathogenicity functional information of viral sequences.** Counts and definitions  
848 for ten identified functional signatures of concerns (FunSoCs) identified in this dataset using  
849 SeqScreen.

| <b>FunSoC title</b>     | <b>Counts</b> | <b>FunSoC definition</b>                                                                                                         |
|-------------------------|---------------|----------------------------------------------------------------------------------------------------------------------------------|
| Viral adhesion          | 44,482        | Mediates viral adherence to host cells                                                                                           |
| Viral counter signaling | 35,256        | Viral suppression of host immune signaling within host cells to avoid inflammatory responses                                     |
| Host xenophagy          | 33,656        | Target host xenophagy/autophagy                                                                                                  |
| Viral invasion          | 4,376         | Mediates viral invasion into host cell                                                                                           |
| Host transcription      | 949           | Target host transcription to inhibit or activate                                                                                 |
| Host ubiquitin          | 880           | Target host ubiquitination machinery                                                                                             |
| Host cell death         | 802           | Target host apoptotic cell death pathways either to inhibit or activate                                                          |
| Resist complement       | 144           | Enable resistance from host complement components                                                                                |
| Antibiotic resistance   | 4             | Counters the effect of antibiotics administered to inhibit the growth or vital functioning of bacterial or eukaryotic parasites. |
| Induce inflammation     | 1             | Directly activate host inflammatory pathways to cause damage                                                                     |

850

851

852 **Table 2: Zoonotic risk assessment for arboviruses using two models in an external**  
 853 **validation dataset.** The classification, accession numbers, arbovirus status, pathogenic  
 854 functional features, and zoonotic status of viruses. “Risk Rank” is determined using the  
 855 Zoonotic Risk Assessment tool, while “AHPP” refers to the Arbovirus Human Pathogen  
 856 Prediction results developed in this study. VCS: Viral counter signaling; HX: Host xenophagy;  
 857 HCD: Host cell death; VA: Viral adhesion.

| Family           | Genus           | Virus                                                     | Accession                                                                                                                                          | Status             | VA                 | HX | VSC | HCD | Known Zoonotic | Risk Rank | AHPP |
|------------------|-----------------|-----------------------------------------------------------|----------------------------------------------------------------------------------------------------------------------------------------------------|--------------------|--------------------|----|-----|-----|----------------|-----------|------|
| Flaviviridae     | Orthoflavivirus | Japanese encephalitis virus (JEV)                         | HQ652538                                                                                                                                           | Arbovirus          | 1                  | 1  | 1   | 0   | 1              | Very high | 1    |
| Nairoviridae     | Orthonairovirus | Nairobi sheep disease virus (NSDV)                        | MZ244233                                                                                                                                           | Arbovirus          | 0                  | 0  | 0   | 0   | 1              | Medium    | 0    |
| Peribunyaviridae | Orthobunyavirus | Bunyamwera virus (BUNV)                                   | MH484289                                                                                                                                           | Arbovirus          | 1                  | 0  | 0   | 0   | 1              | High      | 1    |
|                  |                 | Ebinur Lake virus (EBIV)                                  | NC_079003-<br>NC_079005<br>OR861624<br>OM800984<br>OM800987-<br>OM800991<br>OM800994<br>OM800996-<br>OM800998<br>OM801001-<br>OM801005<br>OM801007 | -                  | 0                  | 0  | 0   | 0   | 0              | Very high | 0    |
|                  |                 | Restan virus (RESV)                                       | MK896475-<br>MK896477                                                                                                                              | Arbovirus          | 0                  | 0  | 0   | 0   | 1              | Very high | 0    |
|                  |                 | Tataguine virus (TATV)                                    | MK896454-<br>MK896456                                                                                                                              | Probable Arbovirus | 0                  | 0  | 0   | 0   | 1              | High      | 0    |
|                  |                 | Palma virus                                               | MK896493                                                                                                                                           | -                  | 1                  | 0  | 0   | 1   | 0              | Medium    | 1    |
| Phenuiviridae    | Bandavirus      | Severe fever with thrombocytopenia syndrome virus (SFTSV) | LC536536 -<br>LC536542<br>LC536546 -<br>LC536552<br>LC536556 -<br>LC536562                                                                         | Arbovirus          | 1                  | 0  | 0   | 1   | 1              | Very high | 1    |
|                  |                 | Uukuvirus                                                 | Zaliv Terpeniya virus (ZTV)                                                                                                                        | MK896425           | Possible Arbovirus | 1  | 0   | 0   | 0              | 0         | High |

858



859 **Figure 1: Global characteristics of hematophagous arthropod vectors and non-vector**  
860 **hosts for arboviruses and ISVs.** (A) Global distribution and quantity of hematophagous  
861 arthropod vectors. (B) The diversity of vector hosts, their geographic locations across  
862 continents, and their prevalence in various climatic conditions. (C) Diversity and quantity of  
863 non-vector hosts associated with arboviruses and ISVs. (D) Distribution of viruses across  
864 non-vector hosts: the horizontal axis represents the number of non-vector hosts a virus can  
865 infect, and the vertical axis indicates the total number of such viruses.  
866

867 **Figure 2: Importance of epidemiological characteristics for human pathogenicity of**  
868 **viruses.** The weighted contributions of various epidemiological features to the prediction of  
869 human pathogenicity within the framework of an XGBoost regression model.  
870  
871

872 **Figure 3: Distribution of host range across viruses with divergent pathogenic functions.**

873 The host range for viruses without zoonotic potential (A) and those possessing known

874 zoonotic capabilities (B). The actual counts of viruses within each category are presented as

875 percentage representations.

876

877 **Figure 4: Comprehensive assessment of model performance metrics** Evaluating model  
878 performance through the utilization of the ROC Curve (A) and Confusion Matrix (B).  
879  
880

881 **Figure 5: Comparative analysis of feature importance in pathogenicity assessment.** In the  
882 evaluation of the XGBoost model, the importance of pathogenicity features is determined  
883 through three distinct metrics: Gain (A), Cover (B), and Weight (C). These metrics  
884 collectively illuminate the relative importance of each feature in assessing the human  
885 pathogenicity of viruses transmitted by hematophagous arthropod vectors.  
886

887 **Figure 6: Impact of viral function on pathogenicity predictions via SHAP analysis.** The  
888 collective contribution of various viral functions on the model's pathogenicity predictions, as  
889 analyzed through SHAP.  
890

891 **Figure 7: Interactions among key features in pathogenicity predictions.** The specific  
892 interactions among critical features within pathogenicity prediction models, including the  
893 relationship between viral sequence size and Viral adhesion (A), Host xenophagy and Viral  
894 adhesion (B), as well as Viral invasion and Viral counter signaling (C).  
895  
896

897 **Supplementary Information**

898 **Supplementary Table 1: Family and genus of hematophagous arthropod vector in**

899 **database.** The family of of hematophagous arthropods examined and enumerates the genera

900 within each family.

| <b>Family Name</b> | <b>Counts of Genus</b> |
|--------------------|------------------------|
| Culicidae          | 25                     |
| Phlebotominae      | 12                     |
| Ixodidae           | 5                      |
| Argasidae          | 2                      |
| Ceratopogonidae    | 1                      |
| Cimicidae          | 1                      |
| Simuliidae         | 1                      |
| Tabanidae          | 1                      |



901 **Supplementary Table 2: Epidemiological characteristics in regression model.** A summary  
 902 of the 37 variables, categorized into three groups, utilized in our regression model.

| <b>Classification</b> | <b>Name of characteristics</b>             | <b>Detailed description of characteristics</b> |
|-----------------------|--------------------------------------------|------------------------------------------------|
| Virus                 | Virus_Group                                | Arboviruses or ISVs                            |
|                       | Virus_g                                    | Virus genus                                    |
|                       | Virus_f                                    | Virus family                                   |
|                       | Numbers                                    | Numbers of viruses                             |
|                       | Baltimore                                  | Baltimore classification of viruses            |
| Virus vector hosts    | Vector_g                                   | Genus of virus vector hosts                    |
|                       | Vector_f                                   | Family of virus vector hosts                   |
|                       | Vector_o                                   | Order of virus vector hosts                    |
|                       | Vector_c                                   | Class of virus vector hosts                    |
|                       | Continent                                  | Continent of vectors                           |
|                       | Country                                    | Country of vectors                             |
|                       | Climate                                    | Climate of vectors                             |
|                       | Cross_vector_g                             | Numbers of cross-vector host genera            |
|                       | Cross_vector_f                             | Numbers of cross-vector host families          |
|                       | Cross_vector_o                             | Numbers of cross-vector host orders            |
|                       | Cross_vector_c                             | Numbers of cross-vector host classes           |
|                       | Total_vector                               | Total numbers of cross-vector hosts            |
|                       | Vector_g_t                                 | Total numbers of cross-vector host genera      |
|                       | Vector_f_t                                 | Total numbers of cross-vector host families    |
|                       | Vector_o_t                                 | Total numbers of cross-vector host orders      |
| Vector_c_t            | Total numbers of cross-vector host classes |                                                |
| Non-vector hosts      | Aves                                       | Viruses from Aves hosts                        |
|                       | Carnivora                                  | Viruses from Carnivora host                    |
|                       | Rodentia                                   | Viruses from Rodentia host                     |
|                       | Chiroptera                                 | Viruses from Chiroptera host                   |
|                       | Primates                                   | Viruses from Primates host                     |
|                       | Homo                                       | Viruses from Homo host                         |
|                       | Didelphimorphia                            | Viruses from Didelphimorphia host              |
|                       | Artiodactyla                               | Viruses from Artiodactyla host                 |
|                       | Perissodactyla                             | Viruses from Perissodactyla host               |
|                       | Eulipotyphla                               | Viruses from Eulipotyphla host                 |
|                       | Reptilia                                   | Viruses from Reptilia host                     |
|                       | Lagomorpha                                 | Viruses from Lagomorpha host                   |
|                       | Anura                                      | Viruses from Anura host                        |
|                       | Pilosa                                     | Viruses from Pilosa host                       |
|                       | Diprotodontia                              | Viruses from Diprotodontia host                |
|                       | cross_host                                 | Total numbers of cross non-vector hosts        |

903 **Supplementary Table 3: Hyperparameter settings for the XGBoost regression model.**

904 Optimized parameter settings for the XGBoost regression model obtained through

905 experimentation.

| <b>Hyperparameter</b> | <b>Value</b>                |
|-----------------------|-----------------------------|
| booster               | dart                        |
| eta                   | 0.15                        |
| max_depth             | 3                           |
| subsample             | 0.7                         |
| objective             | reg:logistic                |
| tree_method           | exact                       |
| max_cat_threshold     | 20                          |
| scale_pos_weight      | 0.792                       |
| eval_metric           | ["logloss", "auc", 'error'] |

906 **Supplementary Table 4: Hyperparameter settings for the XGBoost classification model.**

907 Optimized parameter settings for the XGBoost classification model obtained through

908 experimentation.

| <b>Hyperparameter</b> | <b>Value</b>    |
|-----------------------|-----------------|
| objective             | binary:logistic |
| tree_method           | exact           |
| scale_pos_weight      | 0.26            |
| eta                   | 0.15            |

909 **Supplementary Table 5: Assessment Results of Zoonotic Potential for Arboviruses in the**  
 910 **External Validation Dataset.** The 95% confidence intervals for scores delineate the range of  
 911 values for assessing zoonotic potential. In this zoonotic ranking system, the classifications of  
 912 “Very High” and “High” indicate a significant zoonotic potential, while “Medium” and “Low”  
 913 classifications suggest a reduced zoonotic potential, indicating a lower probability of human  
 914 infection.

| <b>Virus</b>                                      | <b>Score (95%CI)</b> | <b>Zoonotic Rank</b> |
|---------------------------------------------------|----------------------|----------------------|
| Aino virus                                        | 0.7 [0.37, 0.93]     | Very high            |
| Antequera virus                                   | 0.54 [0.32, 0.84]    | Very high            |
| Birao virus                                       | 0.65 [0.38, 0.92]    | Very high            |
| Ebinur lake virus                                 | 0.53 [0.33, 0.78]    | Very high            |
| Japanese encephalitis virus                       | 0.62 [0.37, 0.87]    | Very high            |
| Kaikalur virus                                    | 0.61 [0.32, 0.85]    | Very high            |
| Potosi virus                                      | 0.61 [0.38, 0.86]    | Very high            |
| Restan virus                                      | 0.56 [0.35, 0.82]    | Very high            |
| Severe fever with thrombocytopenia syndrome virus | 0.62 [0.32, 0.9]     | Very high            |
| Termeil virus                                     | 0.56 [0.33, 0.85]    | Very high            |
| Turlock orthobunyavirus                           | 0.48 [0.3, 0.81]     | Very high            |
| Abras virus                                       | 0.49 [0.29, 0.71]    | High                 |
| Barranqueras virus                                | 0.38 [0.22, 0.54]    | High                 |
| Bertioga virus                                    | 0.35 [0.18, 0.55]    | High                 |
| Boraceia virus                                    | 0.35 [0.2, 0.58]     | High                 |
| Bozo virus                                        | 0.39 [0.22, 0.6]     | High                 |
| Bruconha virus                                    | 0.32 [0.15, 0.54]    | High                 |
| Bunyamwera virus                                  | 0.46 [0.24, 0.73]    | High                 |
| Caimito virus                                     | 0.46 [0.26, 0.75]    | High                 |
| Enseada virus                                     | 0.33 [0.17, 0.55]    | High                 |
| Guaratuba virus                                   | 0.33 [0.19, 0.58]    | High                 |
| Gumbo Limbo virus                                 | 0.43 [0.24, 0.67]    | High                 |
| Hughes orthonairovirus                            | 0.31 [0.17, 0.55]    | High                 |
| Kaisodi virus                                     | 0.39 [0.21, 0.59]    | High                 |
| Las Maloyas virus                                 | 0.39 [0.21, 0.59]    | High                 |
| Nola virus                                        | 0.33 [0.16, 0.53]    | High                 |
| Northway virus                                    | 0.32 [0.15, 0.54]    | High                 |
| Okola virus                                       | 0.41 [0.24, 0.61]    | High                 |
| Oya virus                                         | 0.3 [0.16, 0.55]     | High                 |
| Peaton virus                                      | 0.4 [0.24, 0.58]     | High                 |
| Pueblo Viejo virus                                | 0.3 [0.15, 0.51]     | High                 |
| Resistencia virus                                 | 0.48 [0.27, 0.77]    | High                 |
| Shokwe virus                                      | 0.31 [0.16, 0.48]    | High                 |
| Sunday Canyon virus                               | 0.35 [0.18, 0.58]    | High                 |
| Tataguine virus                                   | 0.36 [0.22, 0.66]    | High                 |
| Tensaw virus                                      | 0.46 [0.22, 0.75]    | High                 |
| Tinaroo virus                                     | 0.4 [0.23, 0.69]     | High                 |

---

|                                  |                   |        |
|----------------------------------|-------------------|--------|
| Tlacotalpan virus                | 0.52 [0.28, 0.8]  | High   |
| Wanowrie virus                   | 0.31 [0.16, 0.55] | High   |
| Wongal virus                     | 0.3 [0.16, 0.51]  | High   |
| Wyeomyia_orthobunyavirus         | 0.46 [0.25, 0.71] | High   |
| Yaba-7 virus                     | 0.34 [0.17, 0.58] | High   |
| Zaliv Terpeniya virus            | 0.51 [0.28, 0.78] | High   |
| Anopheles B virus                | 0.24 [0.13, 0.42] | Medium |
| Bushbush virus                   | 0.27 [0.12, 0.44] | Medium |
| Cacao virus                      | 0.19 [0.09, 0.35] | Medium |
| Estero Real orthobunyavirus      | 0.17 [0.09, 0.32] | Medium |
| Gamboia virus                    | 0.26 [0.15, 0.4]  | Medium |
| Huangpi Tick Virus 1             | 0.21 [0.1, 0.34]  | Medium |
| Kairi virus                      | 0.29 [0.13, 0.55] | Medium |
| Ketapang virus                   | 0.28 [0.14, 0.47] | Medium |
| Lednice virus                    | 0.24 [0.13, 0.43] | Medium |
| MAG: Nairobi sheep disease virus | 0.22 [0.09, 0.39] | Medium |
| Main Drain virus                 | 0.18 [0.08, 0.34] | Medium |
| Moriche virus                    | 0.28 [0.13, 0.45] | Medium |
| Pahayokee virus                  | 0.22 [0.12, 0.34] | Medium |
| Palma virus                      | 0.29 [0.15, 0.5]  | Medium |
| San Juan virus                   | 0.25 [0.14, 0.39] | Medium |
| Santa Rosa virus                 | 0.24 [0.12, 0.44] | Medium |
| Sapphire II virus                | 0.2 [0.1, 0.32]   | Medium |
| Tanga virus                      | 0.24 [0.14, 0.41] | Medium |
| Balsa almendravirus              | 0.15 [0.08, 0.24] | Low    |
| Coot Bay virus                   | 0.15 [0.07, 0.24] | Low    |
| Estero Real virus                | 0.18 [0.1, 0.29]  | Low    |

---

915

**A**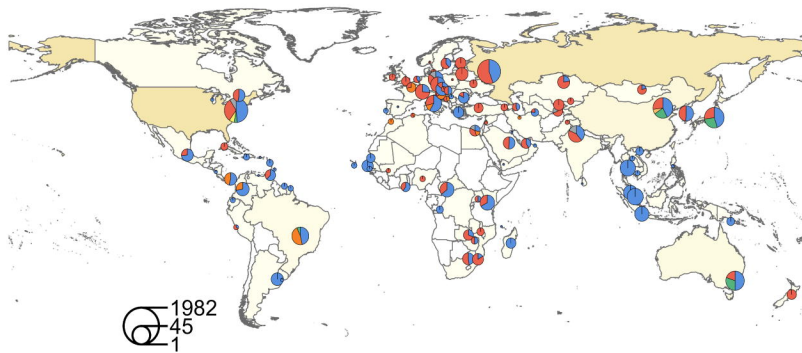**Numbers of viruses**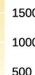**Continent**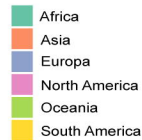**Climate**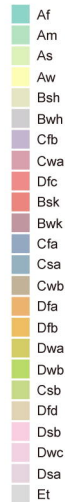**Vectors Family**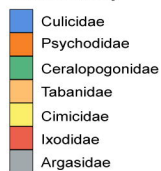**Non-vector hosts**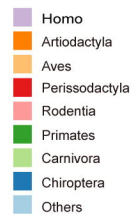**B**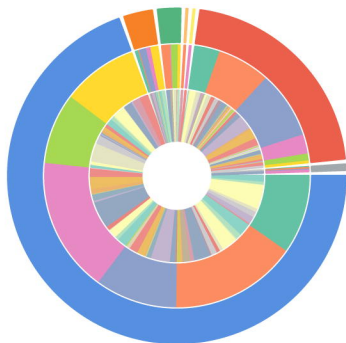**C**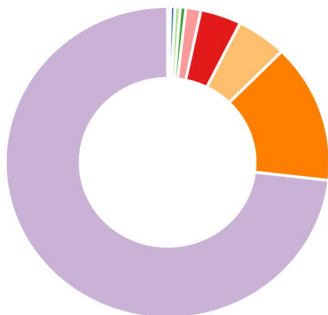**D**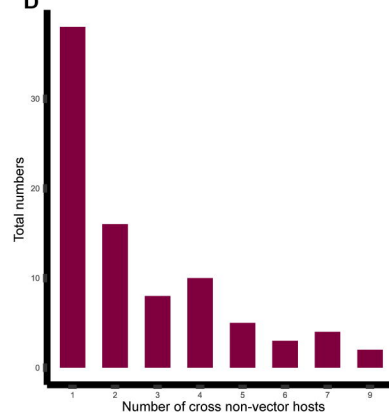

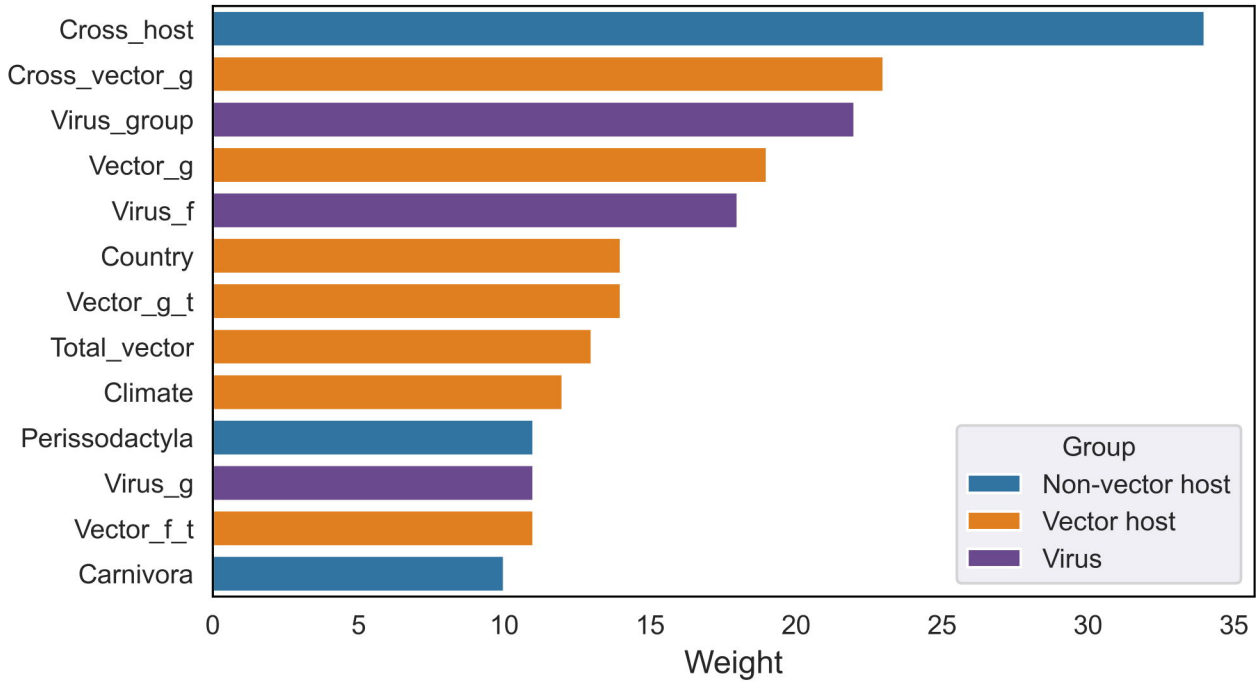

A

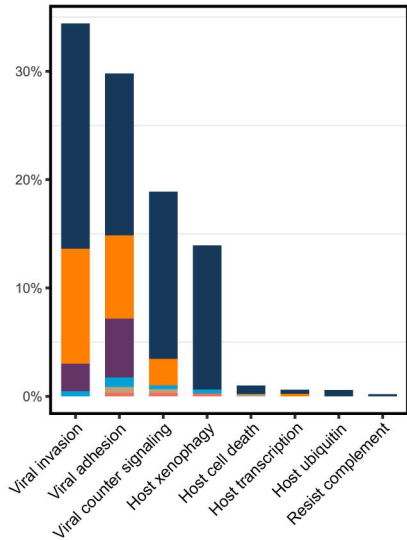

B

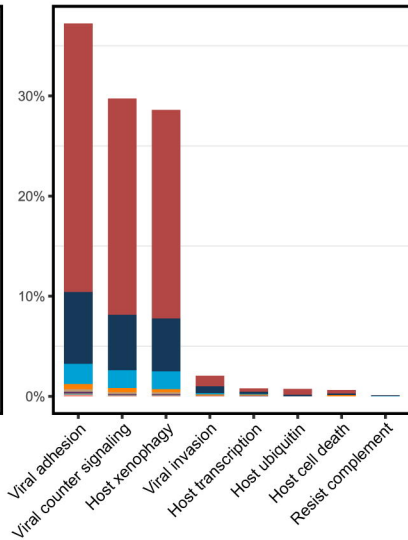

Category

- Homo
- Vectors
- Aves
- Artiodactyla
- Rodentia
- Perissodactyla
- Primates
- Carnivora
- Chiroptera



**A**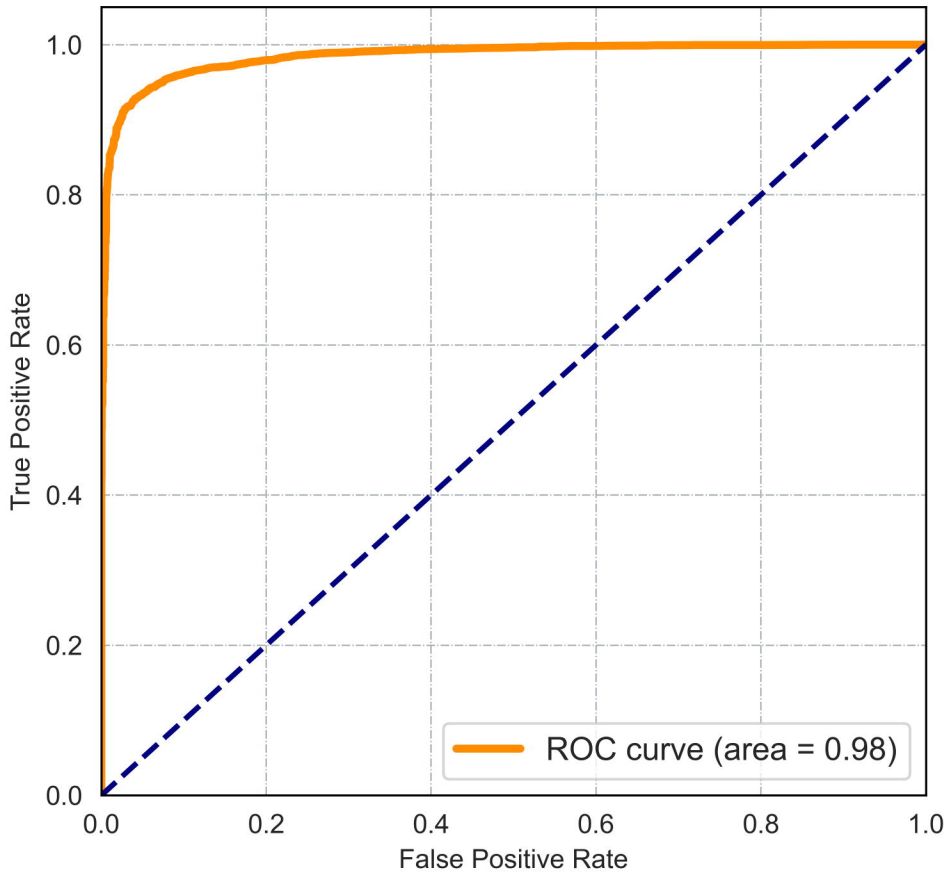**B**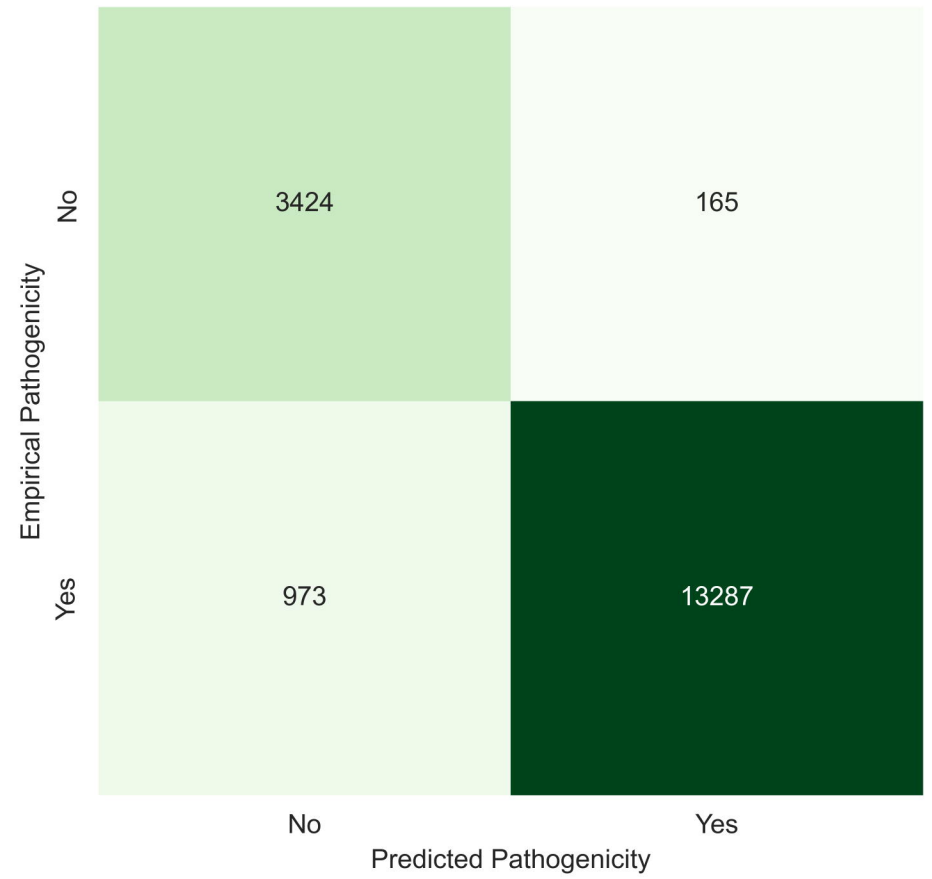

**A**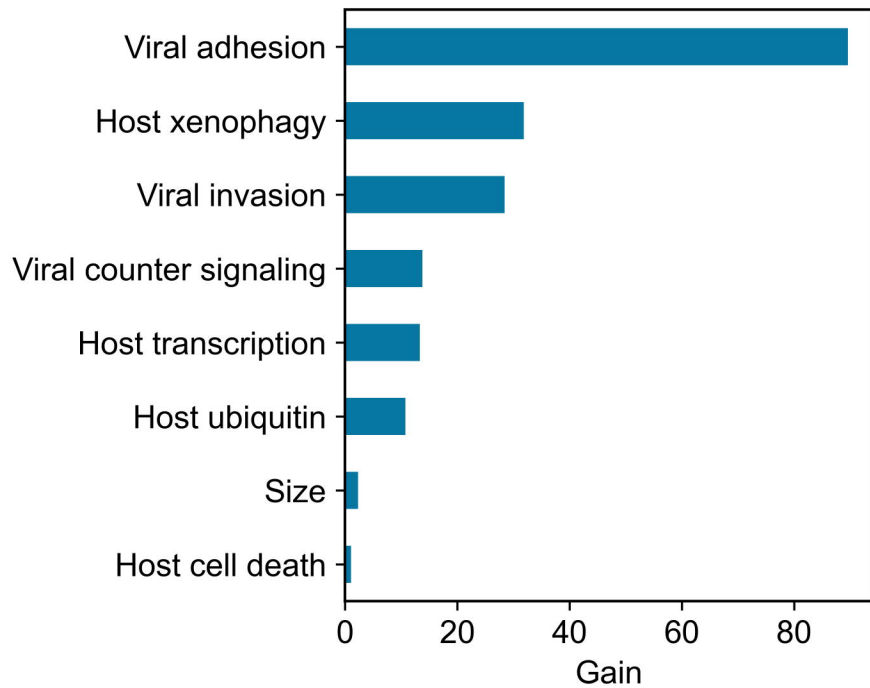**B**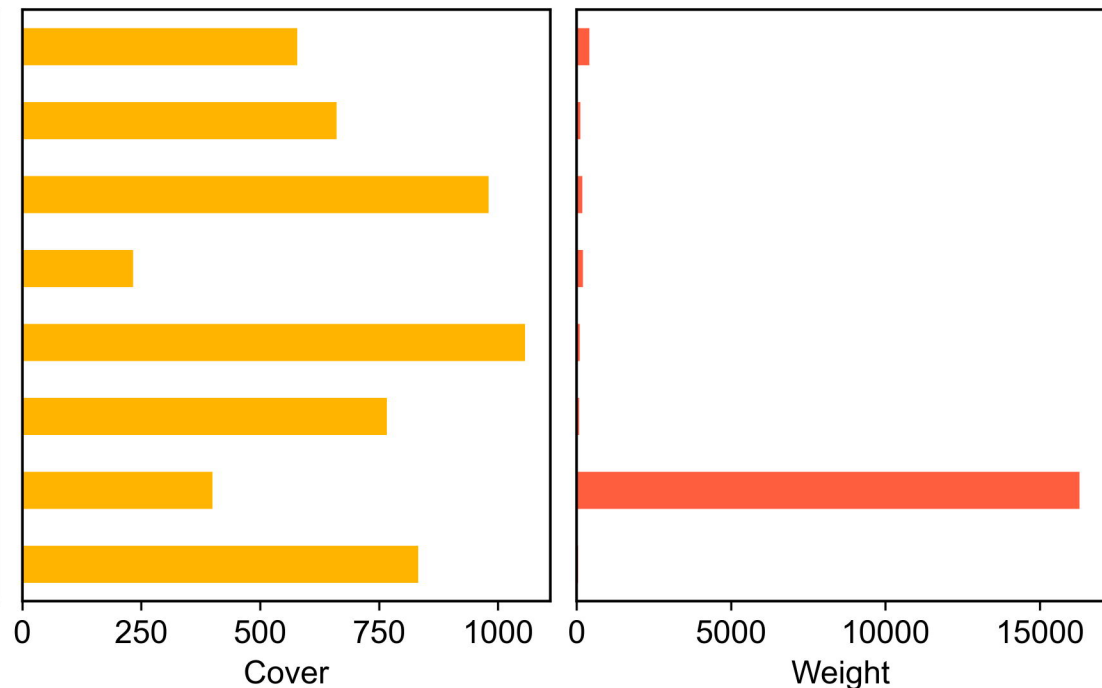**C**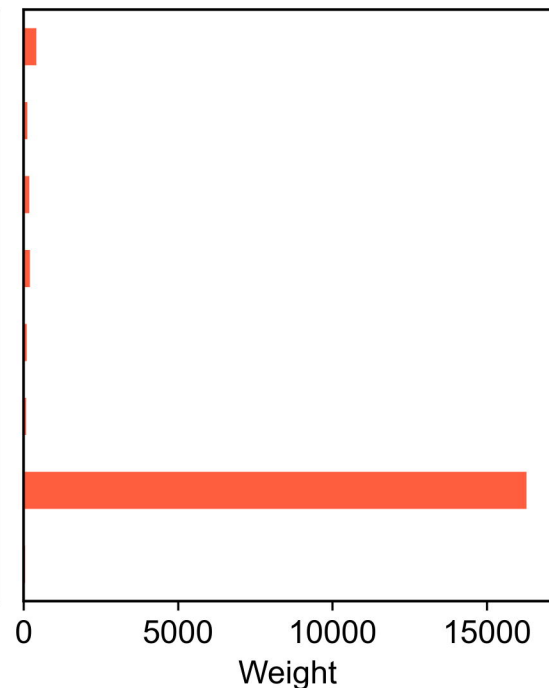

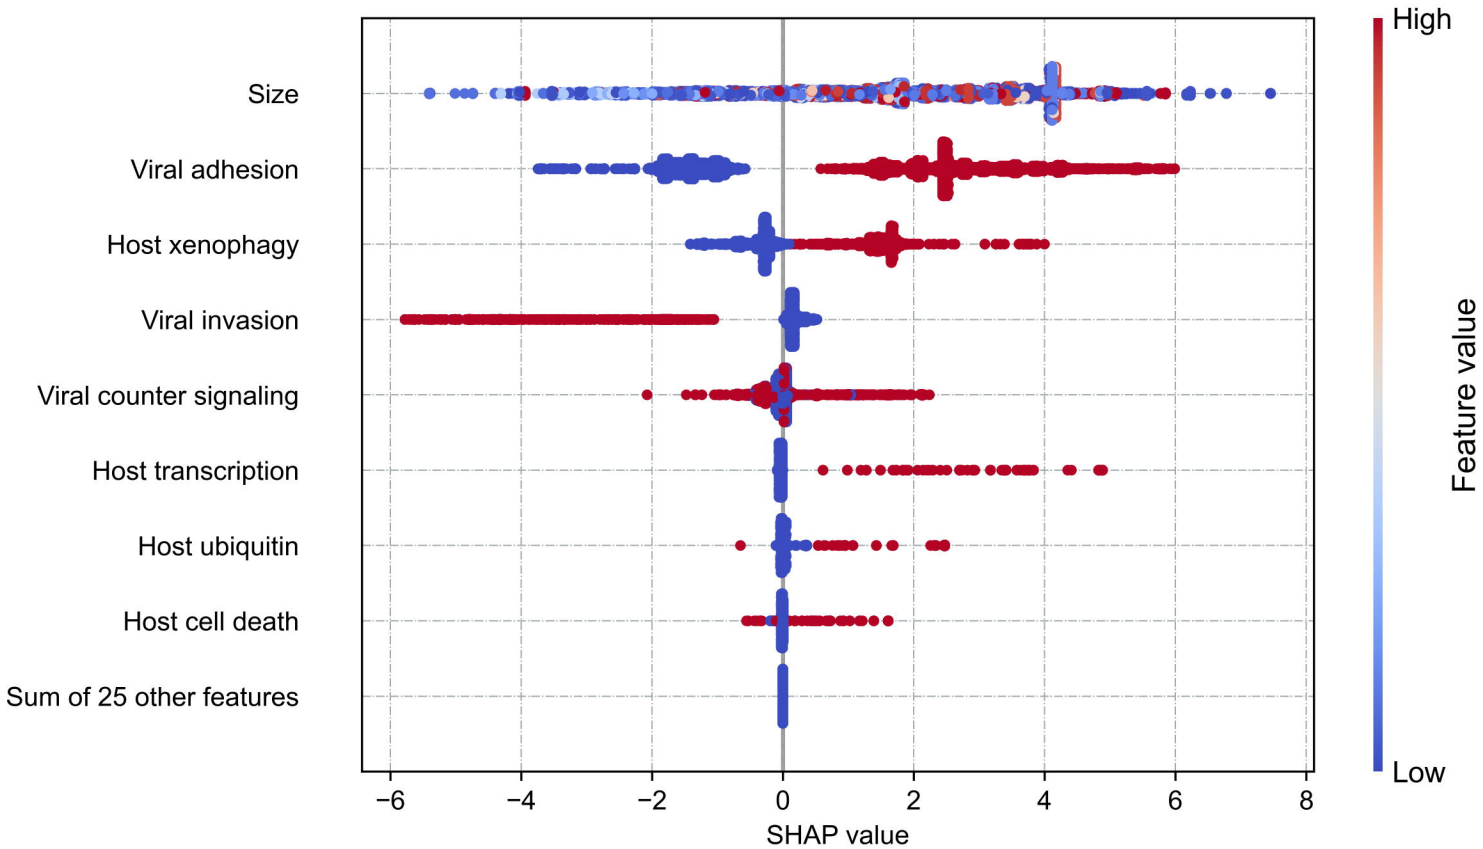

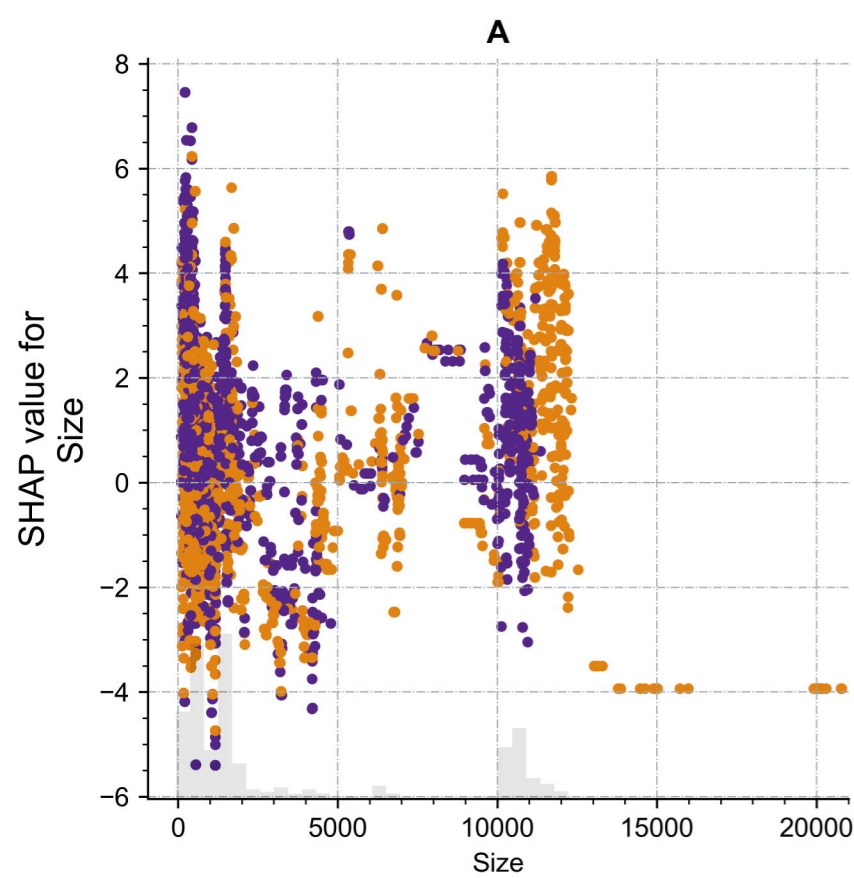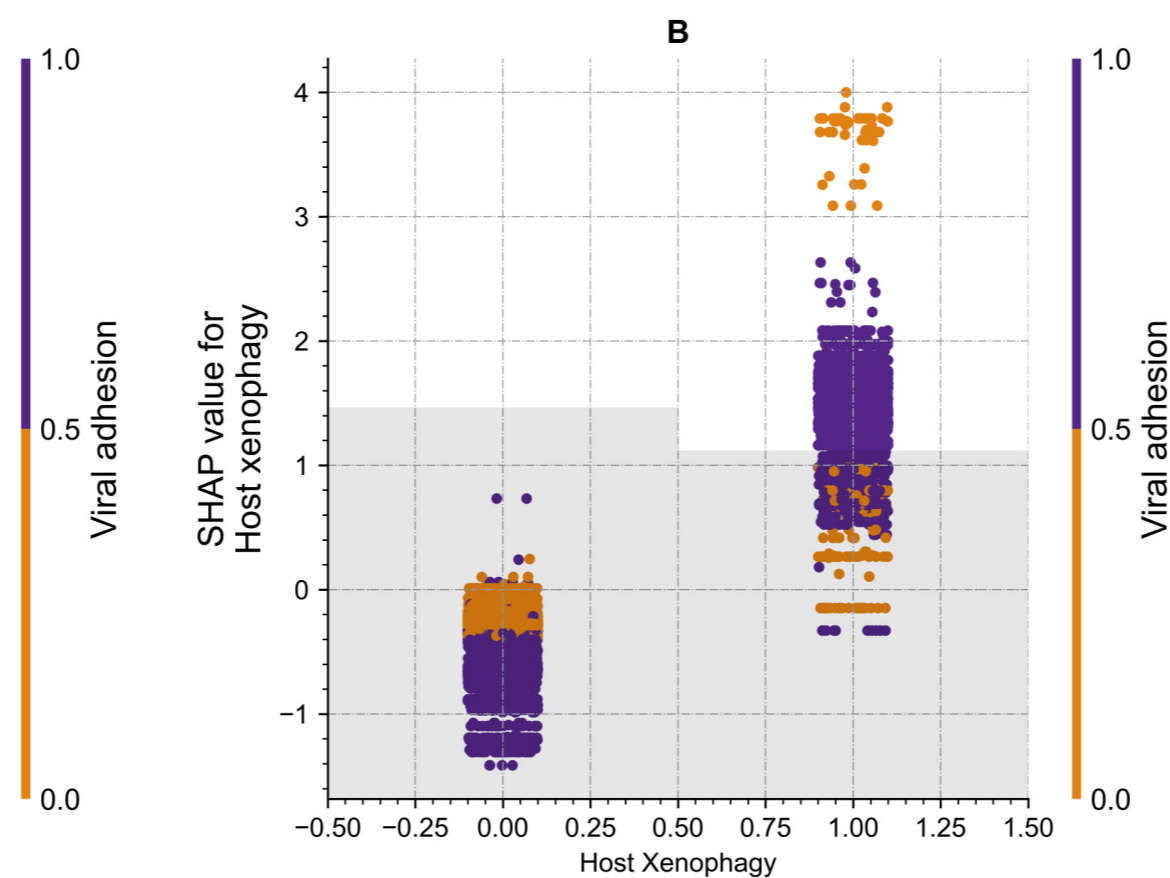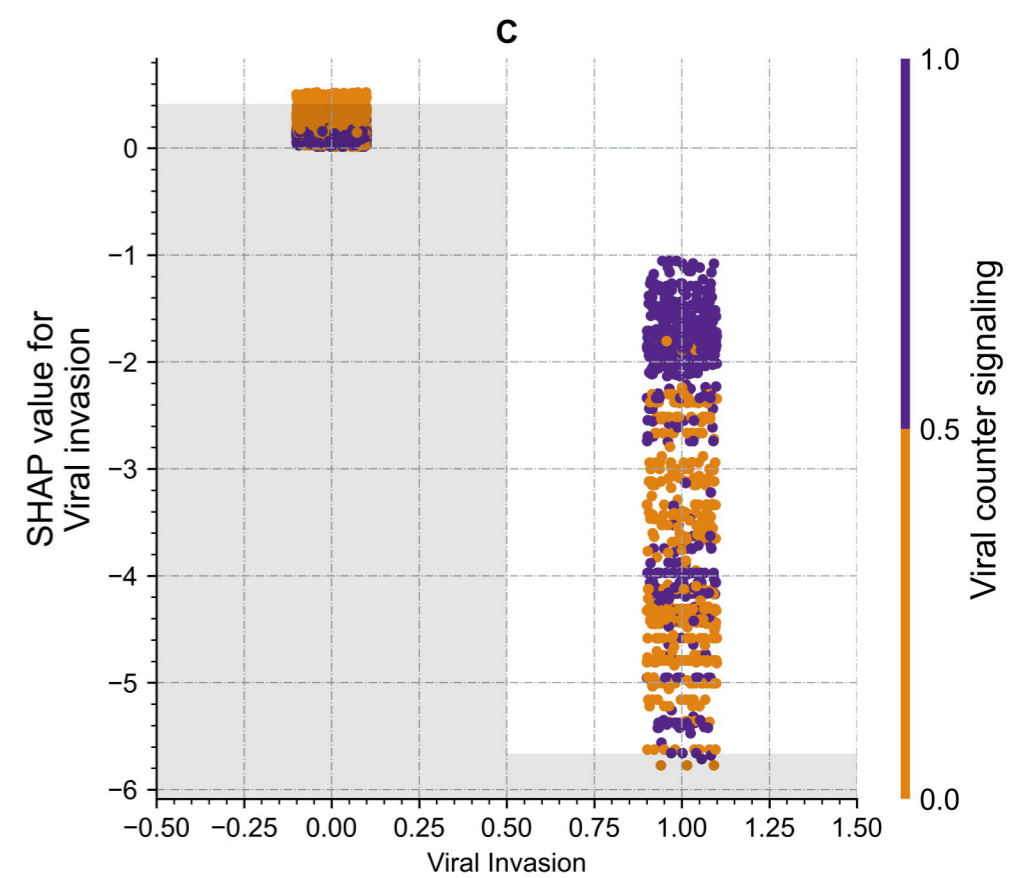

Source: https://medrxiv.org/content/10.1101/2023.12.30.23300660v2.full.pdf
